# Supplementary material for: Regio- and Stereoselective Synthesis of (Z,Z)-Bis(3-amino-3-oxo-1-propenyl) Selenides and Diselenides Based on 2-propynamides: A Novel Family of Diselenides with High Glutathione Peroxidase-like Activity
Source: MDPI journal article supplement (doi:10.3390/inorganics10060074), 2022-05-30

# **Regio- and Stereoselective Synthesis of (Z,Z)-Bis(3-amino-3-oxo-1-propenyl) Selenides and Diselenides Based on 2-Propynamides: A Novel Family of Diselenides with High Glutathione Peroxidase-Like Activity**

Vladimir A. Potapov \*, Mikhail V. Andreev, Maxim V. Musalov, Irina V. Sterkhova, Svetlana V. Amosova and Lyudmila I. Larina

A. E. Favorsky Irkutsk Institute of Chemistry, Siberian Division of The Russian Academy of Sciences, 1 Favorsky Str., Irkutsk 664033, Russian Federation; miand@irioch.irk.ru (M.V.A.); musalov\_maxim@irioch.irk.ru (M.V.M.); amosova@irioch.irk.ru (S.V.A.); irina\_sterkhova@irioch.irk.ru; (I.V.S.); larina@irioch.irk.ru (L.I.L.)

\* Correspondence: v.a.potapov@mail.ru

## **Table of Contents**

|                                                                                                                                                      |             |
|------------------------------------------------------------------------------------------------------------------------------------------------------|-------------|
| <b>Experimental (General Information)</b>                                                                                                            | <b>2</b>    |
| <b><math>^1\text{H}</math>, <math>^{13}\text{C}</math>, <math>^{77}\text{Se}</math>, and <math>^{15}\text{N}</math> NMR spectra of products 2a-i</b> | <b>3-5</b>  |
| <b>Crystal data and structural refinement</b>                                                                                                        | <b>6-8</b>  |
| <b>Examples of <math>^1\text{H}</math>, <math>^{13}\text{C}</math>, and <math>^{77}\text{Se}</math> NMR Spectra</b>                                  | <b>9-25</b> |

## Experimental (General Information)

The  $^1\text{H}$  (400.1 MHz),  $^{13}\text{C}$  (100.6 MHz),  $^{77}\text{Se}$  (76.3 MHz), and  $^{15}\text{N}$  (40.6 MHz) NMR spectra (the spectra can be find in Supplementary Materials) were recorded on a Bruker DPX-400 spectrometer (Bruker BioSpin GmbH, Rheinstetten, Germany) in  $\text{CDCl}_3$  or  $\text{DMSO}-d_6$  5–10% solutions and referred to TMS ( $^1\text{H}$ ,  $^{13}\text{C}$ ), nitromethane ( $^{15}\text{N}$ ) and dimethyl selenide ( $^{77}\text{Se}$ ).

Elemental analysis was performed on a Thermo Scientific Flash 2000 Elemental Analyzer. Melting points were determined on the Kofler apparatus. The organic solvents were dried and distilled according to standard procedures.

Crystal data were collected on a Bruker D8 Venture diffractometer with MoK $\alpha$  radiation ( $\lambda = 0.71073$ ) using the  $\varphi$  and  $\omega$  scans. The structures were solved and refined by direct methods using the SHELX programs set [1]. Data were corrected for absorption effects using the multi-scan method (SADABS). Non-hydrogen atoms were refined anisotropically using SHELX programs set [1]. Supplementary Materials contain the crystallographic data for compounds CCDC 1834087 (**2a**), 1834088 (**2d**), 1834089 (**2f**) and 1841340 (**2i**). These data can be obtained free of charge from the Cambridge Crystallographic Data Centre via [www.ccdc.cam.ac.uk/data\\_request/cif](http://www.ccdc.cam.ac.uk/data_request/cif)

### $^1\text{H}$ , $^{13}\text{C}$ , $^{77}\text{Se}$ , and $^{15}\text{N}$ NMR spectra of products **2a-i**

(*Z,Z*)-Bis(3-amino-3-oxo-1-propenyl) selenide (**2a**):

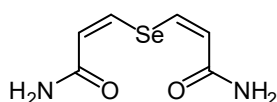

The product was prepared according to the general procedure. The pure sample was obtained by extraction from the residue by acetone. Acetone was removed under reduced pressure to give **2a** (48 mg, 91%); white powder; mp 183–184 °C.  $^1\text{H}$  NMR (400 MHz,  $d_6$ -DMSO):  $\delta$  6.38 (d,  $^3J = 9.5$  Hz, 2H, =CHCO), 7.11, 7.50 (br s, 4H, NH<sub>2</sub>), 7.65 (d,  $^3J = 9.5$  Hz, 2H, SeCH=).  $^{13}\text{C}$  NMR (100 MHz,  $d_6$ -DMSO):  $\delta$  120.6 (=C=CO), 145.3 (SeC=,  $^1J_{\text{Se-C}} = 128.2$  Hz), 168.1 (C=O).  $^{77}\text{Se}$  NMR (76 MHz,  $d_6$ -DMSO):  $\delta$  507.4.  $^{15}\text{N}$  NMR (40 MHz,  $d_6$ -DMSO):  $\delta$  -269.5 ( $^1J_{\text{N-H}} = 88.4, 89.2$  Hz); The 2D  $^{15}\text{N}$  NMR HMBC [ $^1\text{H}$ - $^{15}\text{N}$ ] spectrum contain cross-peaks of N-atom with protons of NH<sub>2</sub>.

**(Z,Z)-Bis(N-methyl-3-amino-3-oxo-1-propenyl) selenide (2b):**

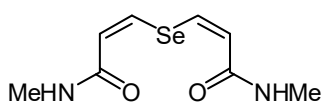

The product was prepared according to the general procedure. After removing the solvent, the product did not require further purification (58 mg 97%); white powder; mp 215–216 °C.  $^1\text{H}$  NMR (400 MHz,  $d_6$ -DMSO):  $\delta$  2.63 (d,  $^3J = 4.4$  Hz, 6H, CH<sub>3</sub>), 6.35 (d,  $^3J = 9.6$  Hz, 2H, =CHCO), 7.59 (d,  $^3J = 9.6$  Hz, 2H, SeCH=), 8.01 (q,  $^3J = 4.4$  Hz, 2H, NH).  $^{13}\text{C}$  NMR (100 MHz,  $d_6$ -DMSO):  $\delta$  25.5 (CH<sub>3</sub>), 120.4 (=C=CO), 144.0 (SeC=,  $^1J_{\text{Se-C}} = 127.4$  Hz), 166.8 (C=O).  $^{77}\text{Se}$  NMR (76 MHz,  $d_6$ -DMSO):  $\delta$  502.7.  $^{15}\text{N}$  NMR (40 MHz,  $d_6$ -DMSO):  $\delta$  -272.9 ( $^1J_{\text{N-H}} = 91.9$  Hz); The 2D  $^{15}\text{N}$  NMR HMBC [ $^1\text{H}$ - $^{15}\text{N}$ ] spectrum contain cross-peaks of N-atom with protons of NH and CH<sub>3</sub>.

**(Z,Z)-Bis(N-phenyl-3-amino-3-oxo-1-propenyl) selenide (2c):**

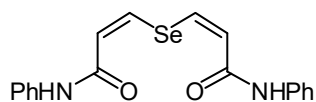

The product was prepared according to the general procedure. After removing the solvent, the residue was dissolved in THF and precipitated with cold hexane (76 mg 85%); yellowish powder; mp 219–220 °C.  $^1\text{H}$  NMR (400 MHz,  $d_6$ -DMSO):  $\delta$  6.65 (d,  $^3J = 9.6$  Hz, 2H, =CHCO), 7.06 (t,  $^3J = 7.7$  Hz, 2H, H<sup>p</sup>), 7.33 (dd,  $^3J = 7.7$  Hz, 4H, H<sup>m</sup>), 7.66 (d,  $^3J = 7.7$  Hz, 4H, H<sup>o</sup>), 7.94 (d,  $^3J = 9.6$  Hz, 2H, SeCH=), 10.23 (s, 2H, NH).  $^{13}\text{C}$  NMR (100 MHz,  $d_6$ -DMSO):  $\delta$  119.0 (=C=CO), 121.0 (C<sup>o</sup>), 123.4 (C<sup>p</sup>), 128.9 (C<sup>m</sup>), 139.1 (C<sup>i</sup>), 146.7 (SeC=,  $^1J_{\text{Se-C}} = 129.0$  Hz), 164.9 (C=O).  $^{77}\text{Se}$  NMR (76 MHz,  $d_6$ -DMSO):  $\delta$  518.8.  $^{15}\text{N}$  NMR (40 MHz,  $d_6$ -DMSO):  $\delta$  -243.1 ( $^3J_{\text{N-H}} = 6.6$  Hz); The 2D  $^{15}\text{N}$  NMR HMBC [ $^1\text{H}$ - $^{15}\text{N}$ ] spectrum contain cross-peaks of N-atom with protons of H<sup>o</sup>.

**(Z,Z)-Bis(N,N-dimethyl-3-amino-3-oxo-1-propenyl) selenide (2d):**

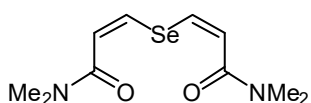

The product was prepared according to the general procedure. After removing the solvent, the residue was dissolved in CHCl<sub>3</sub> and precipitated with cold hexane (55 mg, 84%); white powder; mp 181–182 °C.  $^1\text{H}$  NMR (400 MHz, CDCl<sub>3</sub>):  $\delta$  3.94, 3.00 (s, 12H, CH<sub>3</sub>), 6.68 (d,  $^3J = 9.7$  Hz, 2H, =CHCO), 7.47 (d,  $^3J = 9.7$  Hz, 2H, SeCH=).  $^{13}\text{C}$  NMR

(100 MHz, CDCl<sub>3</sub>):  $\delta$  35.4, 37.2 (CH<sub>3</sub>), 116.8 (=C=CO), 147.6 (SeC=,  $^1J_{\text{Se-C}} = 132.6$  Hz), 166.9 (C=O).  $^{77}\text{Se}$  NMR (76 MHz, CDCl<sub>3</sub>):  $\delta$  516.8.  $^{15}\text{N}$  NMR (40 MHz, CDCl<sub>3</sub>):  $\delta$  -281.5; The 2D  $^{15}\text{N}$  NMR HMBC  $\{^1\text{H}-^{15}\text{N}\}$  spectrum contain cross-peaks of N-atom with protons of CH<sub>3</sub> and =CHCO.

**(Z,Z)-Bis(N,N-diethyl-3-amino-3-oxo-1-propenyl) selenide (2e):**

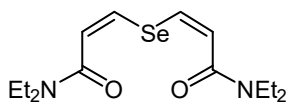

The product was prepared according to the general procedure. After removing the solvent, the residue was dissolved in CHCl<sub>3</sub>, cold hexane was added and the mixture was placed in the refrigerator (-18 °C) for crystallization. Obtained solid was dried in vacuum (65 mg, 82%); pale yellow viscous solid; mp 56–57 °C.  $^1\text{H}$  NMR (400 MHz, CDCl<sub>3</sub>):  $\delta$  1.14 (t,  $^3J = 6.8$  Hz, 12H, CH<sub>3</sub>), 3.33, 3.41 (q,  $^3J = 6.8$  Hz, 8H, CH<sub>2</sub>), 6.66 (d,  $^3J = 9.7$  Hz, 2H, =CHCO), 7.48 (d,  $^3J = 9.7$  Hz, 2H, SeCH=).  $^{13}\text{C}$  NMR (100 MHz, CDCl<sub>3</sub>):  $\delta$  13.2, 14.8 (CH<sub>3</sub>), 40.6, 42.1 (CH<sub>2</sub>), 117.1 (=C=CO), 147.5 (SeC=,  $^1J_{\text{Se-C}} = 131.9$  Hz), 166 (C=O).  $^{77}\text{Se}$  NMR (76 MHz, CDCl<sub>3</sub>):  $\delta$  519.4.  $^{15}\text{N}$  NMR (40 MHz, CDCl<sub>3</sub>):  $\delta$  -251.5; The 2D  $^{15}\text{N}$  NMR HMBC  $\{^1\text{H}-^{15}\text{N}\}$  spectrum contain cross-peaks of N-atom with all protons.

**(Z,Z)-Bis(N,N-diphenyl-3-amino-3-oxo-1-propenyl) selenide (2f):**

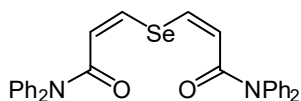

The product was prepared according to the general procedure for 8 h. After removing the solvent, the residue was dissolved in CHCl<sub>3</sub> and precipitated with cold hexane. Yield: (111 mg, 88%); beige powder; mp 201–203 °C.  $^1\text{H}$  NMR (400 MHz, CDCl<sub>3</sub>):  $\delta$  6.35 (d,  $^3J = 9.7$  Hz, 2H, =CHCO), 7.23–7.30 (m, 12H, H<sup>o,p</sup>), 7.32–7.40 (m, 8H, H<sup>m</sup>), 7.48 (d,  $^3J = 9.7$  Hz, 2H, SeCH=).  $^{13}\text{C}$  NMR (100 MHz, CDCl<sub>3</sub>):  $\delta$  119.6 (=C=CO), 125.1–128.6 (C<sup>o,p</sup>), 129.2 (C<sup>m</sup>), 142.6 (C<sup>i</sup>), 149.2 (SeC=,  $^1J_{\text{Se-C}} = 133.9$  Hz), 166.3 (C=O).  $^{77}\text{Se}$  NMR (76 MHz, CDCl<sub>3</sub>):  $\delta$  533.3.  $^{15}\text{N}$  NMR (40 MHz, CDCl<sub>3</sub>):  $\delta$  -232.3; The 2D  $^{15}\text{N}$  NMR HMBC  $\{^1\text{H}-^{15}\text{N}\}$  spectrum contain cross-peaks of N-atom with protons of =CHCO, SeCH= and H<sup>o</sup>.

**(Z,Z)-Bis(N,N-dicyclohexyl-3-amino-3-oxo-1-propenyl) selenide (2g):**

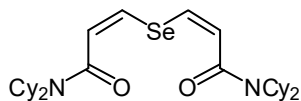

The product was prepared according to the general procedure. After removing the solvent, the residue was recrystallized from benzene (77 mg, 66%); white powder; mp 127–129 °C.  $^1\text{H}$  NMR (400 MHz, CDCl<sub>3</sub>):  $\delta$  1.03–1.38, 1.44–1.90 (m, 36H, H<sup>2-6</sup>), 2.19 (br m, 4H, H<sup>2,6</sup>), 3.45 (br m, 4H, H<sup>1</sup>), 6.70 (d,  $^3J = 9.7$  Hz, 2H, =CHCO), 7.39 (d,  $^3J = 9.7$  Hz, 2H, SeCH=).  $^{13}\text{C}$  NMR (100 MHz, CDCl<sub>3</sub>):  $\delta$  24.4 (C<sup>3,4,5</sup>), 25.4 (C<sup>3,5</sup>), 29.4, 30.6, 31.0 (C<sup>2,6</sup>), 54.5, 56.0 (C<sup>1</sup>), 118.8 (=C=CO), 145.0 (SeC=,  $^1J_{\text{Se-C}} = 130.6$  Hz), 165.4 (C=O).  $^{77}\text{Se}$  NMR (76 MHz, CDCl<sub>3</sub>):  $\delta$  508.7.  $^{15}\text{N}$  NMR (40 MHz, CDCl<sub>3</sub>):  $\delta$  -233.4; The 2D  $^{15}\text{N}$  NMR HMBC  $\{^1\text{H}-^{15}\text{N}\}$  spectrum contain cross-peaks of N-atom with protons of =CHCO and SeCH=.

**(Z,Z)-Bis(3-morpholino-3-oxo-1-propenyl) selenide (2h):**

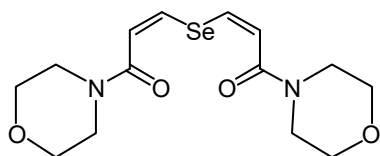

The product was prepared according to the general procedure. After removing the solvent, the residue was dissolved in  $\text{CHCl}_3$  and precipitated with cold hexane (72 mg, 84%); white powder; mp 196–197 °C.  $^1\text{H}$  NMR (400 MHz,  $\text{CDCl}_3$ ):  $\delta$  3.52 (br m, 4H,  $\text{H}^{3,5}$ ), 3.65 (br m, 12H,  $\text{H}^{3,5}$ ,  $\text{H}^{2,6}$ ), 6.70 (d,  $^3J = 9.7$  Hz, 2H,  $=\text{CHCO}$ ), 7.56 (d,  $^3J = 9.7$  Hz, 2H,  $\text{SeCH=}$ ).  $^{77}\text{Se}$  NMR (76 MHz,  $\text{CDCl}_3$ ):  $\delta$  520.2.  $^{15}\text{N}$  NMR (40 MHz,  $\text{CDCl}_3$ ):  $\delta$  –264.5; The 2D  $^{15}\text{N}$  NMR HMBC [ $^1\text{H}$ – $^{15}\text{N}$ ] ( $\text{CDCl}_3$ ) spectrum contain cross-peaks of N-atom with proton of  $=\text{CHCO}$ .

**(Z,Z)-Bis(3-piperidino-3-oxo-1-propenyl) selenide (2i):**

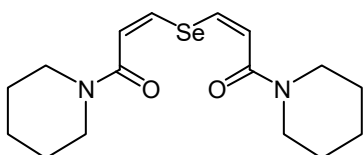

The product was prepared according to the general procedure. After removing the solvent, the residue was dissolved in  $\text{CHCl}_3$  and precipitated with cold hexane (72 mg, 85%); beige powder; mp 208–209 °C.  $^1\text{H}$  NMR (400 MHz,  $\text{CDCl}_3$ ):  $\delta$  1.53–1.61 (m, 8H,  $\text{H}^{3,5}$ ), 1.61–1.70 (m, 4H,  $\text{H}^4$ ), 3.49, 3.61 (br m, 8H,  $\text{H}^{2,6}$ ), 6.75 (d,  $^3J = 9.8$  Hz, 2H,  $=\text{CHCO}$ ), 7.49 (d,  $^3J = 9.8$  Hz, 2H,  $\text{SeCH=}$ ).  $^{13}\text{C}$  NMR (100 MHz,  $\text{CDCl}_3$ ):  $\delta$  24.7 ( $\text{C}^4$ ), 25.6, 26.7 ( $\text{C}^{3,5}$ ), 42.9, 46.8 ( $\text{C}^{2,6}$ ), 117.0 ( $=\text{CCO}$ ), 147.1 ( $\text{SeC=}$ ,  $^1J_{\text{Se-C}} = 131.0$  Hz), 165.5 ( $\text{C=O}$ ).  $^{77}\text{Se}$  NMR (76 MHz,  $\text{CDCl}_3$ ):  $\delta$  508.7.  $^{15}\text{N}$  NMR (40 MHz,  $\text{CDCl}_3$ ):  $\delta$  –258.2; The 2D  $^{15}\text{N}$  NMR HMBC [ $^1\text{H}$ – $^{15}\text{N}$ ] spectrum contain cross-peaks of N-atom with protons of  $=\text{CHCO}$  and  $\text{SeCH=}$ .

## Crystal data and structural refinement

Crystal data were collected on a Bruker D8 Venture diffractometer with MoK $\alpha$  radiation ( $\lambda = 0.71073$ ) using the  $\varphi$  and  $\omega$  scans. The structures were solved and refined by direct methods using the SHELX programs set [1]. Data were corrected for absorption effects using the multi-scan method (SADABS). Nonhydrogen atoms were refined anisotropically using SHELX programs set [1]. Crystallographic CCDC data: 1834087 (2a), 1834088 (2d), 1834089 (2f) and 1841340 (2i). These data can be obtained free of charge from the Cambridge Crystallographic Data Centre via [www.ccdc.cam.ac.uk/data\\_request/cif](http://www.ccdc.cam.ac.uk/data_request/cif).

The molecular structures are depicted in Figures S1–S4. Principal bond distances, bond angles and torsion angles are presented in Table S1.

## Reference

1. Sheldrick, G.M. *Acta Crystallogr.* **2008**, D64, 112.

**(Z,Z)-Bis(3-amino-3-oxo-1-propenyl) selenide (2a)**

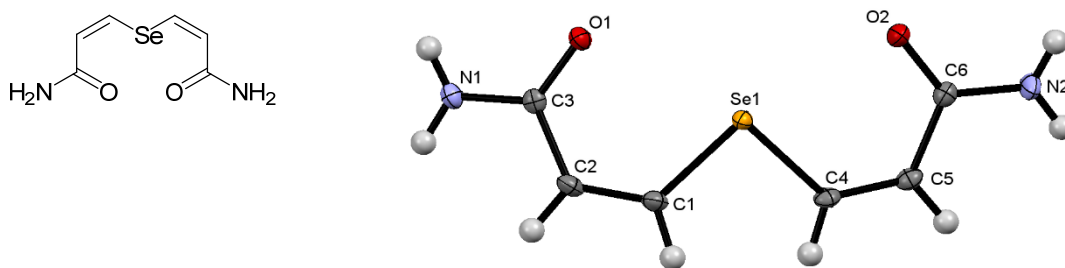

**Figure S1.** Molecular structure of compound **2a** (ORTEP, 50% probability ellipsoids).

Single crystal of **2a** was grown at room temperature by slow evaporation from THF–CCl<sub>4</sub> solution, mounted in inert oil and transferred to the cold gas stream of the diffractometer.

Crystal data. C<sub>6</sub>H<sub>8</sub>N<sub>2</sub>O<sub>2</sub>Se, *M* = 219.10, orthorhombic, *a* = 5.0919(2), *b* = 10.2345(3), *c* = 15.4229(5) Å, *V* = 803.7(1) Å<sup>3</sup>, *T* = 100 K, space group *P*2<sub>1</sub>2<sub>1</sub>2<sub>1</sub> (no.19), *Z* = 4, 7904 reflections measured, 2318 unique (*R*<sup>int</sup> = 0.020), which were used in all calculations. The final *wR*(*F*<sup>2</sup>) was 0.045 (all data).

**(*Z,Z*)-Bis(*N,N*-dimethyl-3-amino-3-oxo-1-propenyl) selenide (**2d**):**

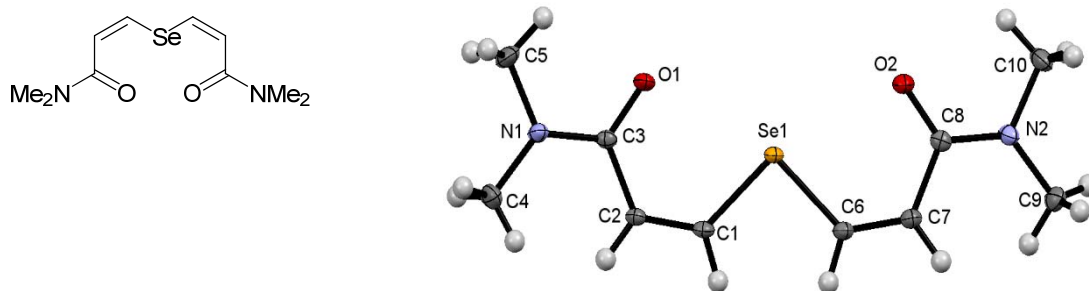

**Figure S2.** Molecular structure of compound **2d** (ORTEP, 50% probability ellipsoids).

Single crystal of **2d** was grown at room temperature by slow evaporation from THF–CCl<sub>4</sub> solution, mounted in inert oil and transferred to the cold gas stream of the diffractometer.

Crystal data. C<sub>10</sub>H<sub>16</sub>N<sub>2</sub>O<sub>2</sub>Se, *M* = 275.21, monoclinic, *a* = 7.7963(3), *b* = 13.5983(5), *c* = 11.9165(5) Å, β = 108.326(1), *V* = 1199.3(1) Å<sup>3</sup>, *T* = 100 K, space group *P*2<sub>1</sub>/n (no.14), *Z* = 4, 38529 reflections measured, 3494 unique (*R*<sup>int</sup> = 0.023), which were used in all calculations. The final *wR*(*F*<sup>2</sup>) was 0.057 (all data).

**(*Z,Z*)-Bis(*N,N*-diphenyl-3-amino-3-oxo-1-propenyl) selenide (**2f**):**

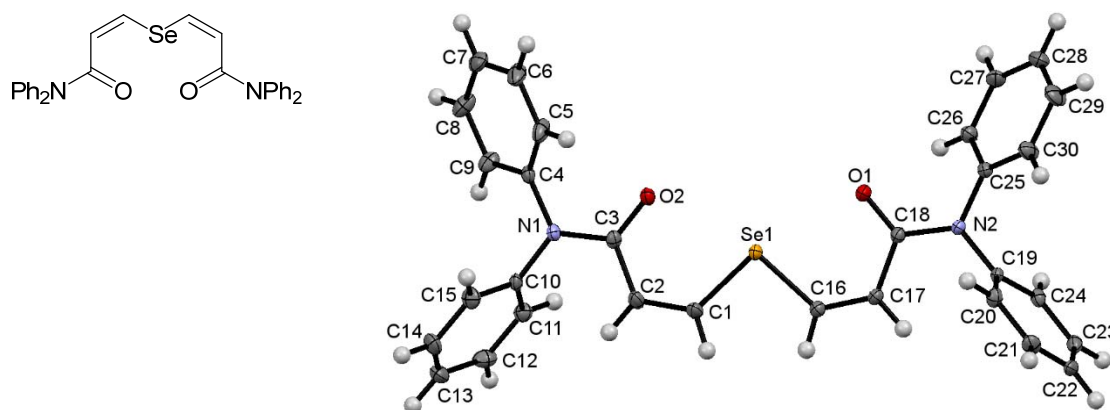

**Figure S3.** Molecular structure of compound **2f** (ORTEP, 50% probability ellipsoids).

Single crystal of **2f** was grown at room temperature by slow evaporation from THF–CCl<sub>4</sub> solution, mounted in inert oil and transferred to the cold gas stream of the diffractometer.

Crystal data. C<sub>30</sub>H<sub>24</sub>N<sub>2</sub>O<sub>2</sub>Se, *M* = 523.48, monoclinic, *a* = 11.2300(4), *b* = 14.5920(5), *c* = 18.5198(6) Å, β = 93.637(1), *V* = 3028.7(2) Å<sup>3</sup>, *T* = 100 K, space group *P*2<sub>1</sub>/n (no.14), *Z* = 4, 85073 reflections measured, 8875 unique (*R*<sup>int</sup> = 0.053), which were used in all calculations. The final *wR*(*F*<sup>2</sup>) was 0.141 (all data).

**(Z)-3-[(Z)-3-oxo-3-piperidino-1-propenyl]selanyl-1-morpholino-2-propen-1-one (2i):**

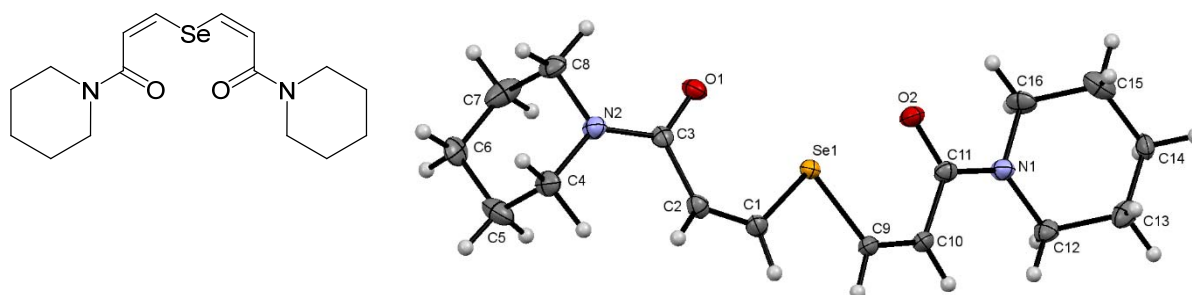

**Figure S4.** Molecular structure of compound **2i** (ORTEP, 50% probability ellipsoids).

Single crystal of **2i** was grown at room temperature by slow evaporation from CH<sub>2</sub>Cl<sub>2</sub>–CCl<sub>4</sub> solution, mounted in inert oil and transferred to the cold gas stream of the diffractometer.

Crystal data. C<sub>16</sub>H<sub>24</sub>N<sub>2</sub>O<sub>2</sub>Se, *M* = 355.30, orthorhombic, *a* = 9.2034(2), *b* = 10.3785(3), *c* = 16.1407(5) Å, *V* = 1541.7(1) Å<sup>3</sup>, *T* = 100 K, space group *P*2<sub>1</sub>2<sub>1</sub>2<sub>1</sub> (no.19), *Z* = 4, 19296 reflections measured, 4497 unique (*R*<sup>int</sup> = 0.028), which were used in all calculations. The final *wR*(*F*<sup>2</sup>) was 0.068 (all data).

**Table S1.** Selected bond lengths, bond and torsion angles in compounds **2a**, **2d**, **2f**, **2i**.

| Amide     | Bond   | <i>l</i> , Å | Angle     | φ, °     | Angle        | θ, °      |
|-----------|--------|--------------|-----------|----------|--------------|-----------|
| <b>2a</b> | Se1–C4 | 1.893(2)     | C4–Se1–C1 | 94.8(1)  | C4–Se1–C1–C2 | -162.4(2) |
|           | Se1–C1 | 1.900(2)     | C2–C1–Se1 | 125.4(2) | Se1–C1–C2–C3 | 3.6(3)    |
|           | O1–C3  | 1.243(3)     | C1–C2–C3  | 122.3(2) | C1–C2–C3–O1  | -22.1(4)  |
|           | O2–C6  | 1.241(3)     | O1–C3–N1  | 122.0(2) | C1–C2–C3–N1  | 155.1(2)  |
|           | N1–C3  | 1.342(3)     | O1–C3–C2  | 121.1(2) | C1–Se1–C4–C5 | -177.2(2) |

|           |         |          |            |          |               |           |
|-----------|---------|----------|------------|----------|---------------|-----------|
|           | N2-C6   | 1.335(3) | N1-C3-C2   | 116.8(2) | Se1-C4-C5-C6  | 4.1(4)    |
|           | C1-C2   | 1.335(3) | C5-C4-Se1  | 125.2(2) | C4-C5-C6-O2   | -4.8(4)   |
|           | C2-C3   | 1.473(3) | C4-C5-C6   | 122.5(2) | C4-C5-C6-N2   | 172.3(2)  |
| <b>2d</b> | Se1-C1  | 1.896(1) | C1-Se1-C6  | 92.5(1)  | C6-Se1-C1-C2  | 173.8(1)  |
|           | Se1-C6  | 1.899(1) | C8-N2-C10  | 119.6(1) | Se1-C1-C2-C3  | -1.7(2)   |
|           | O1-C3   | 1.245(2) | C8-N2-C9   | 125.3(1) | C1-C2-C3-O1   | 12.3(2)   |
|           | C4-N1   | 1.456(2) | C10-N2-C9  | 115.1(1) | C1-C2-C3-N1   | -166.2(1) |
|           | O2-C8   | 1.241(2) | C2-C1-Se1  | 127.0(1) | O1-C3-N1-C4   | -174.1(1) |
|           | N2-C8   | 1.353(2) | C1-C2-C3   | 122.1(1) | C2-C3-N1-C4   | 4.4(2)    |
|           | N2-C10  | 1.453(2) | O1-C3-N1   | 121.7(1) | O1-C3-N1-C5   | 3.9(2)    |
|           | N2-C9   | 1.458(2) | O1-C3-C2   | 120.0(1) | C2-C3-N1-C5   | -177.6(1) |
|           | C1-C2   | 1.338(2) | N1-C3-C2   | 118.3(1) | C1-Se1-C6-C7  | 172.0(1)  |
|           | C2-C3   | 1.473(2) | C3-N1-C4   | 125.3(1) | Se1-C6-C7-C8  | 0.0(2)    |
| <b>2f</b> | Se1-C16 | 1.892(3) | C16-Se1-C1 | 93.7(1)  | Se1-C1-C2-C3  | -0.7(5)   |
|           | Se1-C1  | 1.898(3) | C3-N1-C4   | 120.8(2) | C4-N1-C3-O2   | -3.2(4)   |
|           | O2-C3   | 1.234(3) | C3-N1-C10  | 121.8(2) | C10-N1-C3-O2  | 168.0(3)  |
|           | O1-C18  | 1.229(3) | C4-N1-C10  | 116.9(2) | C16-Se1-C1-C2 | -174.9(3) |
|           | N1-C3   | 1.378(3) | C2-C1-Se1  | 125.7(2) | C4-N1-C3-C2   | 175.8(2)  |
|           | N1-C4   | 1.434(3) | C1-C2-C3   | 120.7(3) | C1-C2-C3-O2   | -7.7(4)   |
|           | C1-C2   | 1.342(4) | O2-C3-N1   | 121.7(2) | C10-N1-C3-C2  | -13.1(4)  |
|           | C2-C3   | 1.465(4) | O2-C3-C2   | 120.5(2) | C1-C2-C3-N1   | 173.3(3)  |
| <b>2i</b> | Se1-C1  | 1.892(3) | C9-Se1-C1  | 94.7(1)  | C9-Se1-C1-C2  | -169.5(3) |
|           | Se1-C9  | 1.891(3) | N2-C4-C5   | 109.7(3) | Se1-C1-C2-C3  | 5.2(4)    |
|           | O1-C3   | 1.248(4) | C11-N1-C16 | 119.6(2) | C1-C2-C3-O1   | -14.0(4)  |
|           | N1-C11  | 1.359(4) | C11-N1-C12 | 127.0(2) | C1-C2-C3-N2   | 163.9(3)  |
|           | N1-C16  | 1.461(4) | C16-N1-C12 | 113.2(2) | O1-C3-N2-C4   | 170.0(3)  |
|           | N1-C12  | 1.473(4) | C2-C1-Se1  | 126.5(2) | C2-C3-N2-C4   | -7.8(4)   |
|           | C1-C2   | 1.330(4) | C1-C2-C3   | 122.0(3) | O1-C3-N2-C8   | 11.4(4)   |
|           | C2-C3   | 1.480(4) | O1-C3-C2   | 119.5(3) | C2-C3-N2-C8   | -166.4(3) |
|           | C3-N2   | 1.350(4) | N2-C3-C2   | 118.8(3) | C5-C4-N2-C3   | -99.5(4)  |
|           | N2-C8   | 1.469(4) | C3-N2-C4   | 125.8(3) | C5-C4-N2-C8   | 60.5(3)   |

## Examples of $^1\text{H}$ , $^{13}\text{C}$ , and $^{77}\text{Se}$ NMR spectra of products

### $^1\text{H}$ , $^{13}\text{C}$ , and $^{77}\text{Se}$ NMR spectra of product 2a



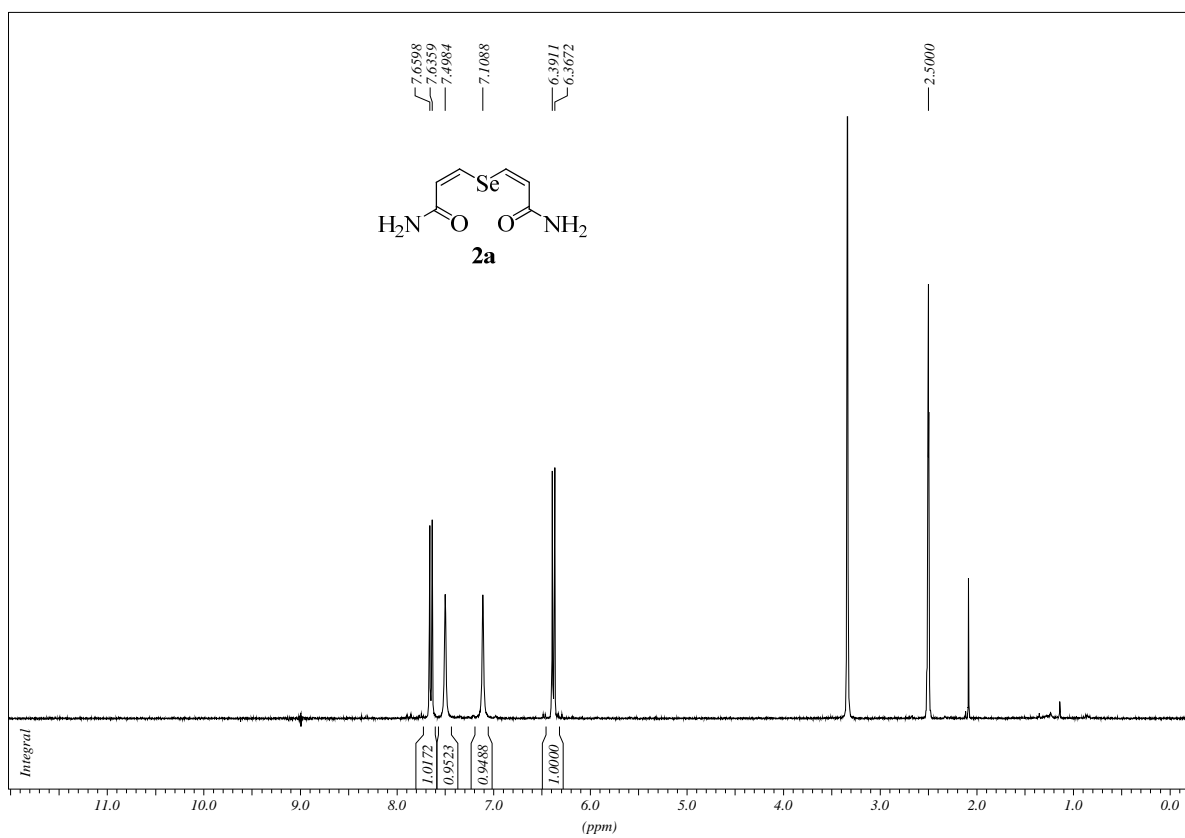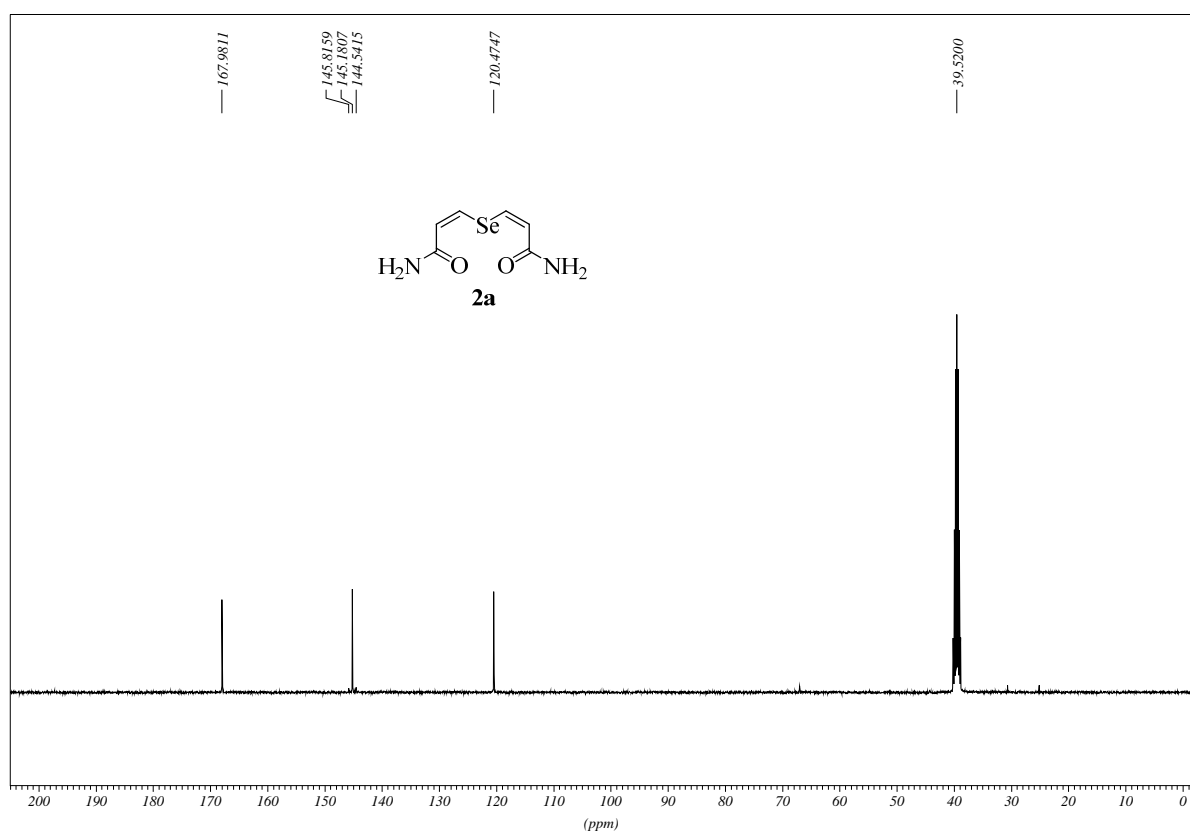

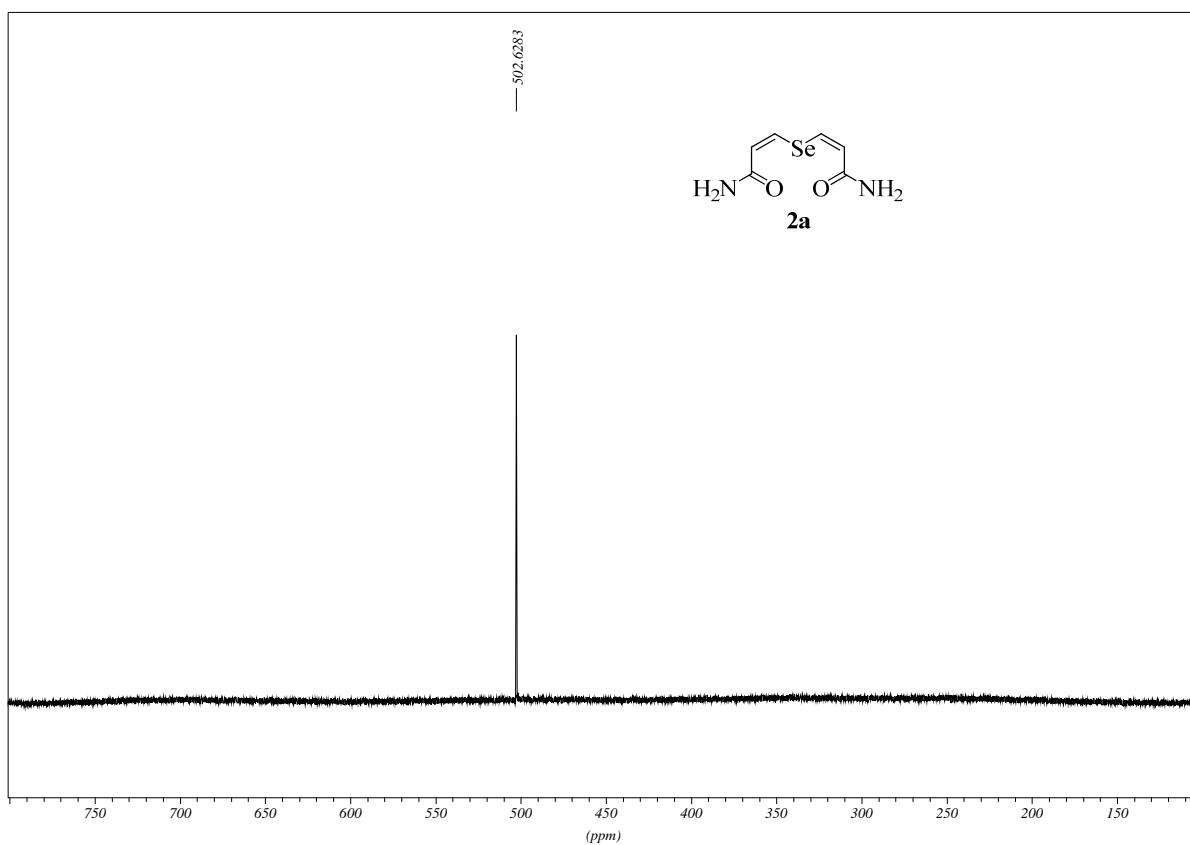

<sup>1</sup>H, <sup>13</sup>C, and <sup>77</sup>Se NMR spectra of product **2b**

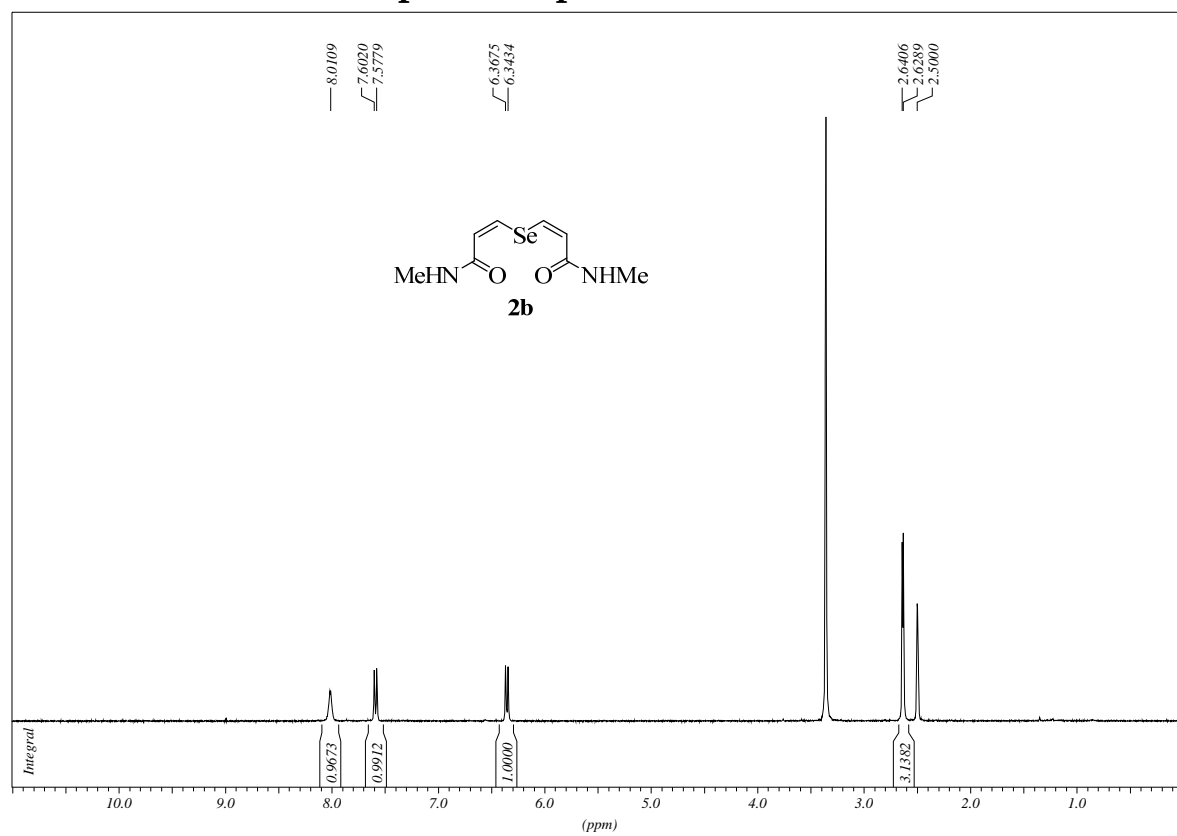

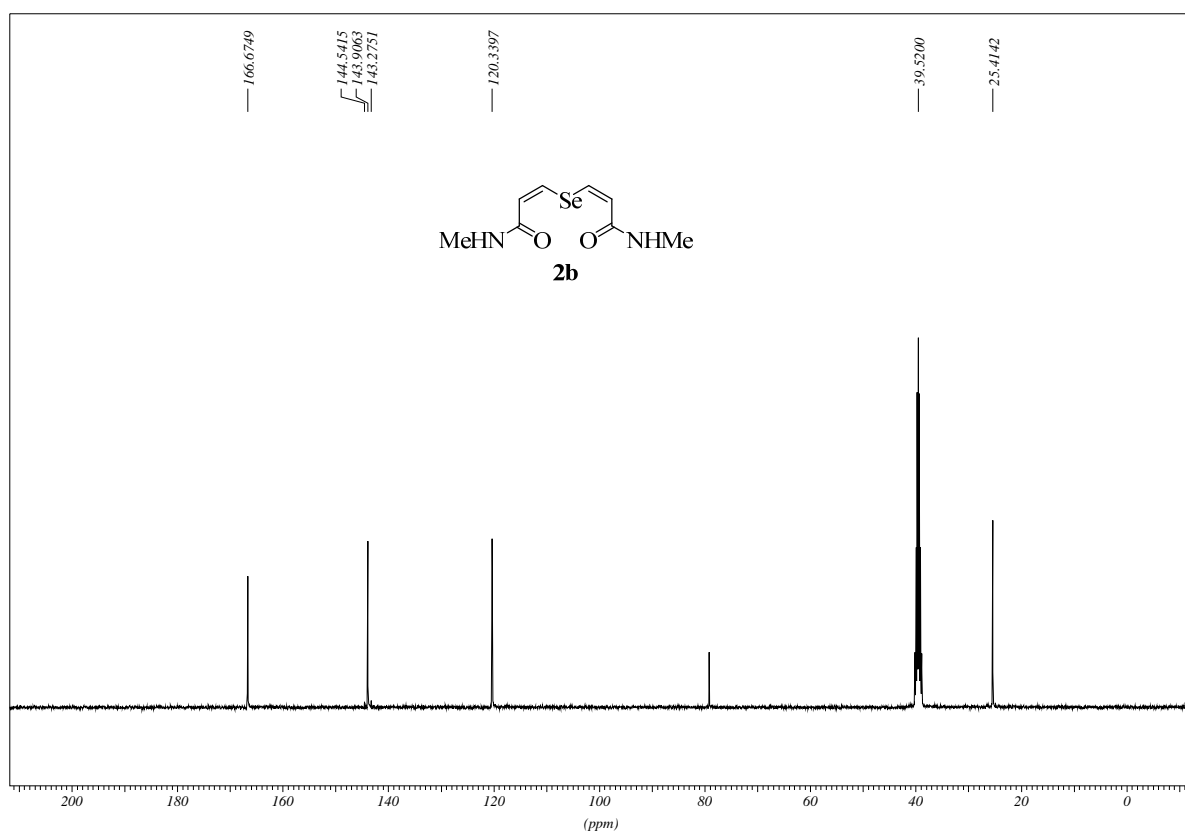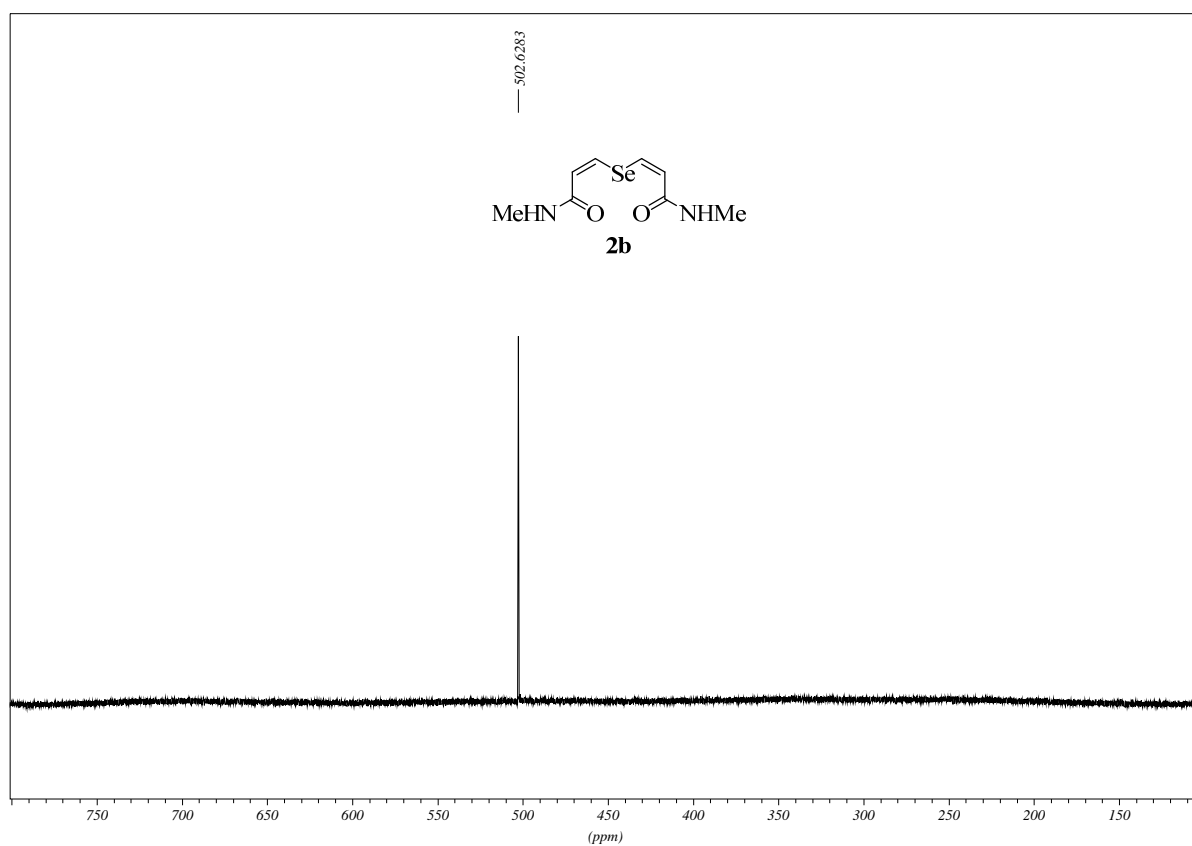

$^1\text{H}$ ,  $^{13}\text{C}$ , and  $^{77}\text{Se}$  NMR spectra of product **2c**

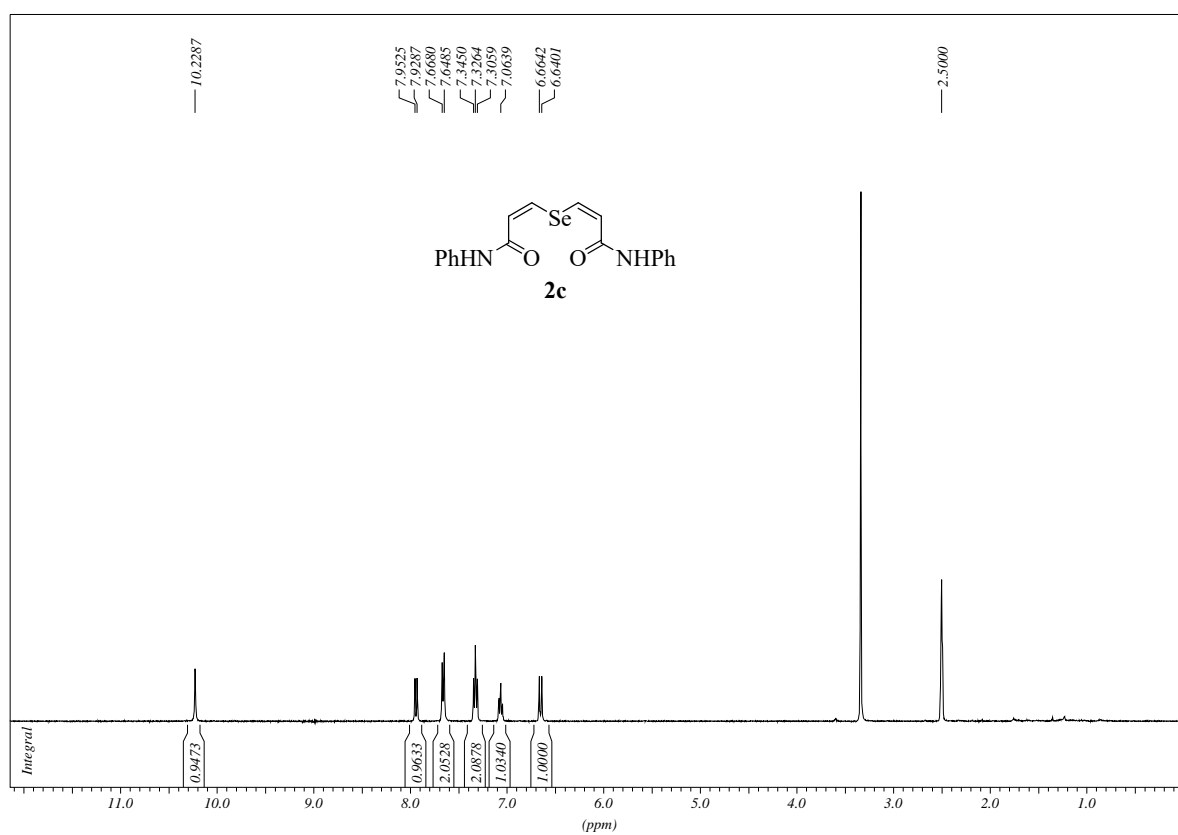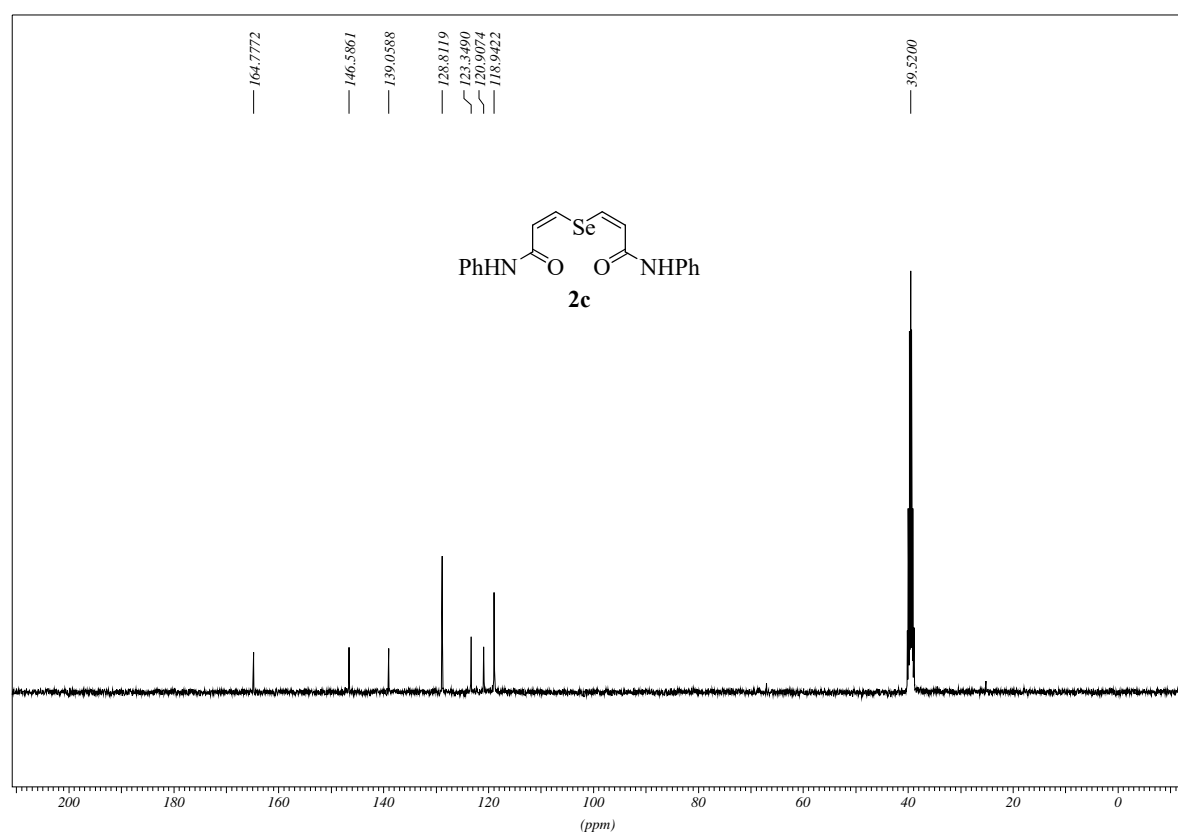

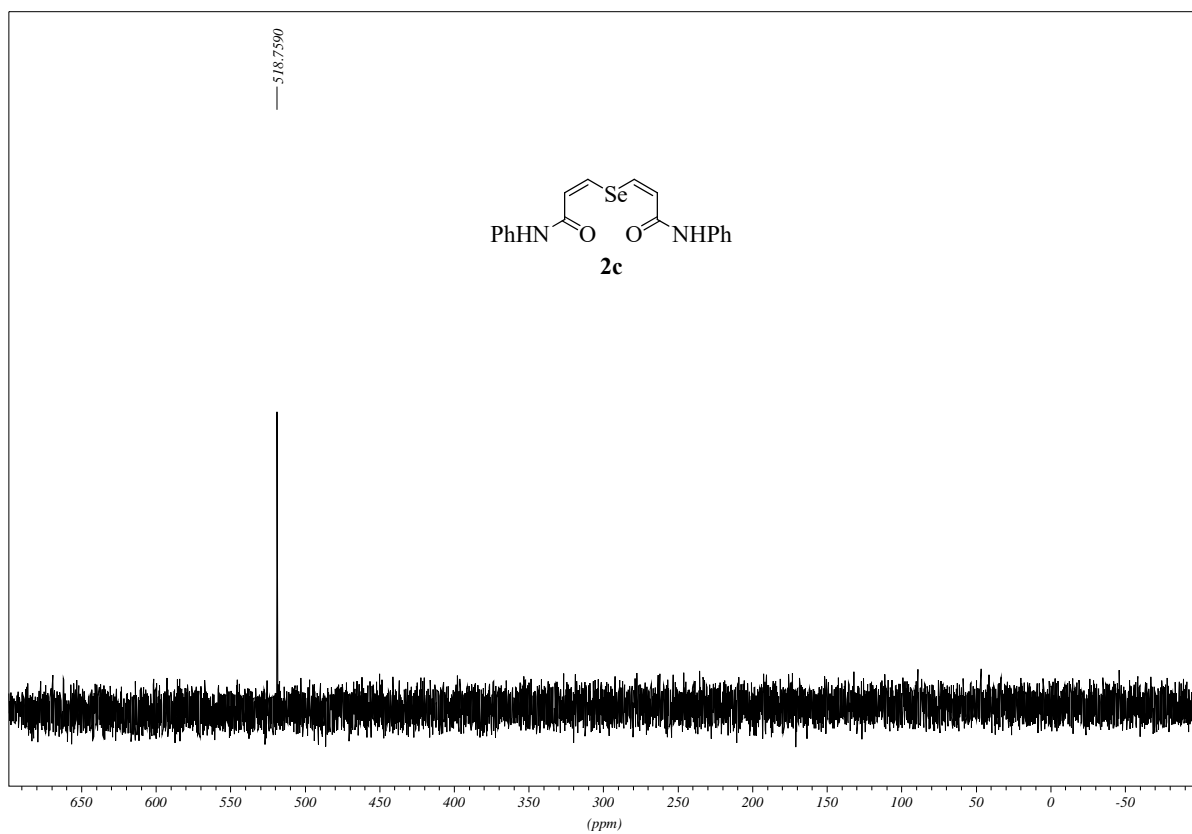

**<sup>1</sup>H, <sup>13</sup>C, and <sup>77</sup>Se NMR spectra of product 2d**

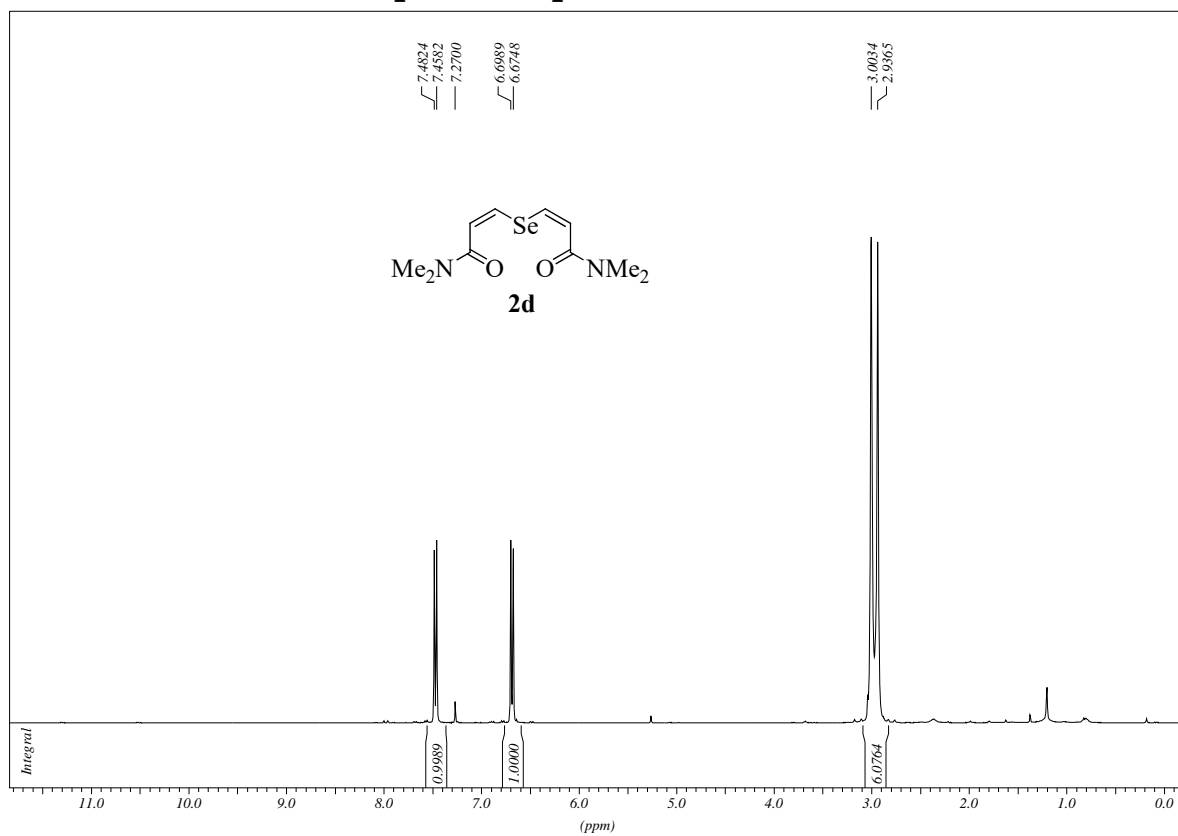

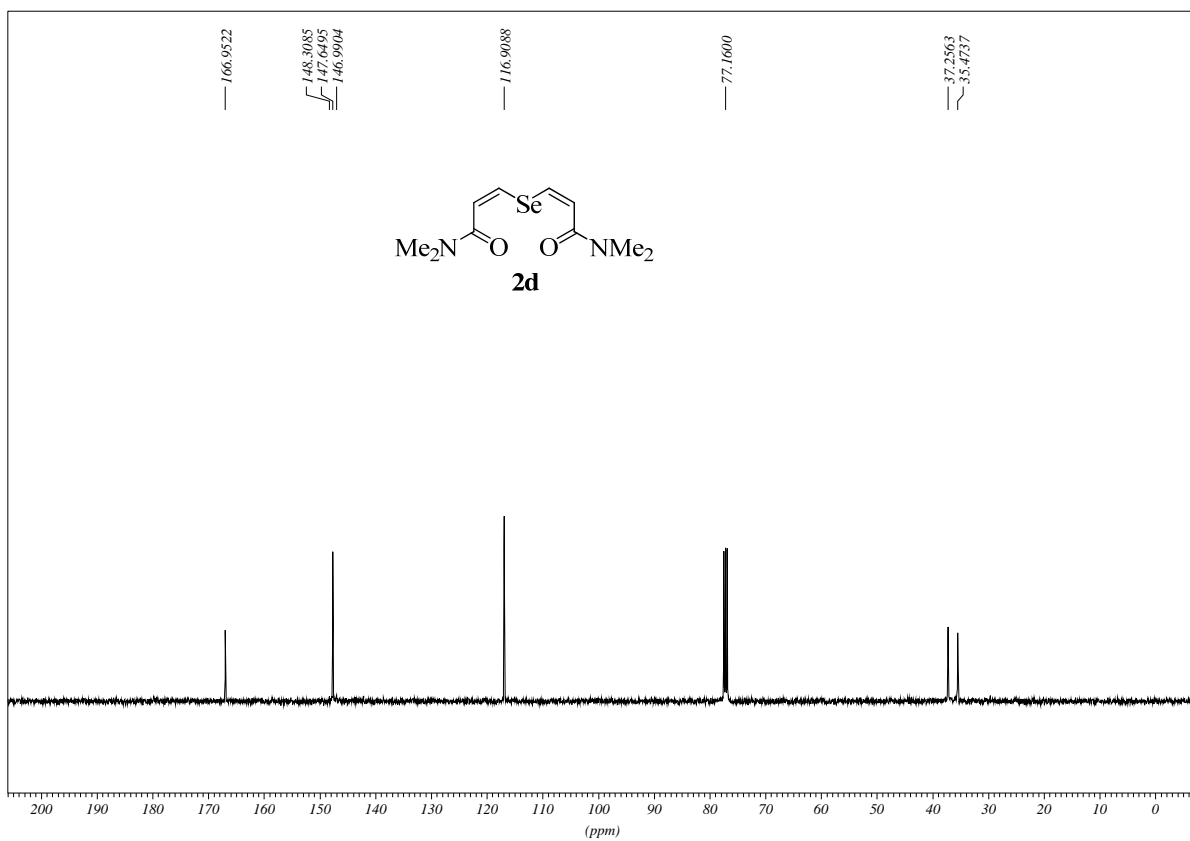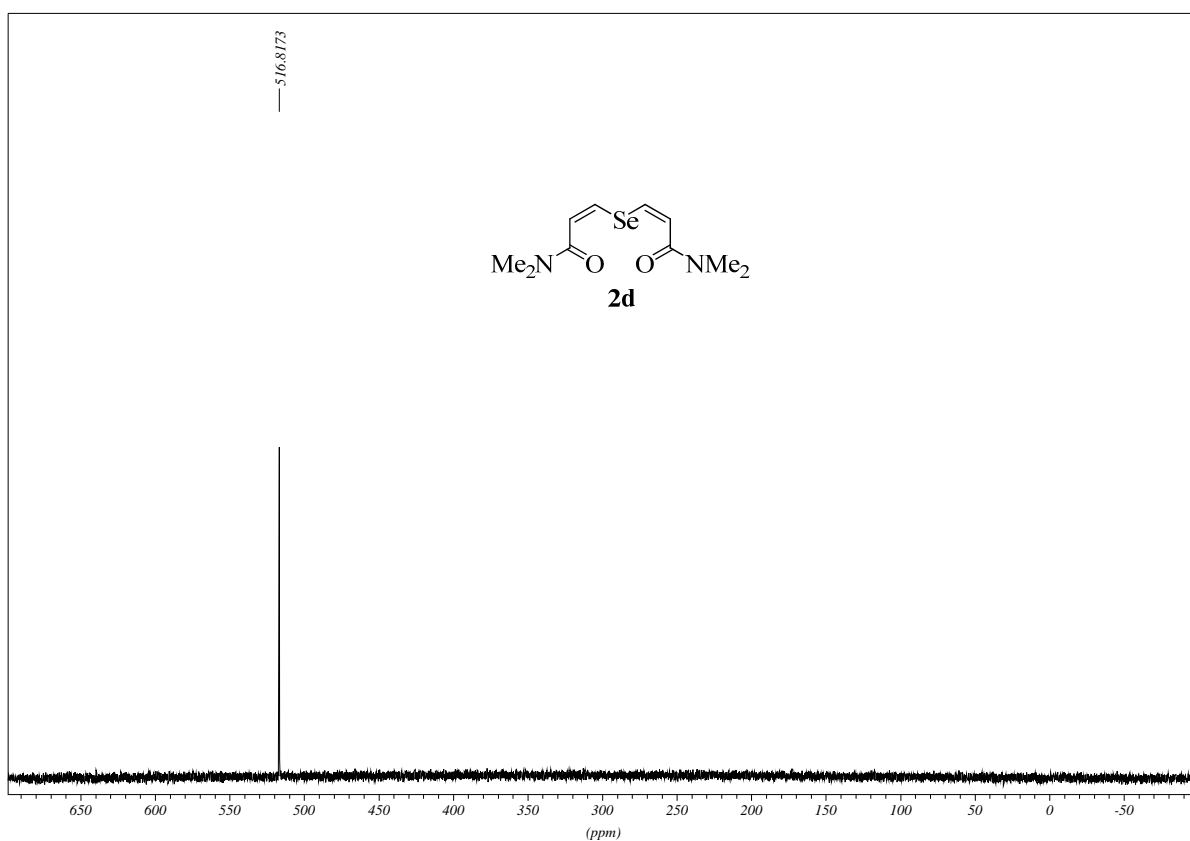

$^1\text{H}$ ,  $^{13}\text{C}$ , and  $^{77}\text{Se}$  NMR spectra of product **2e**

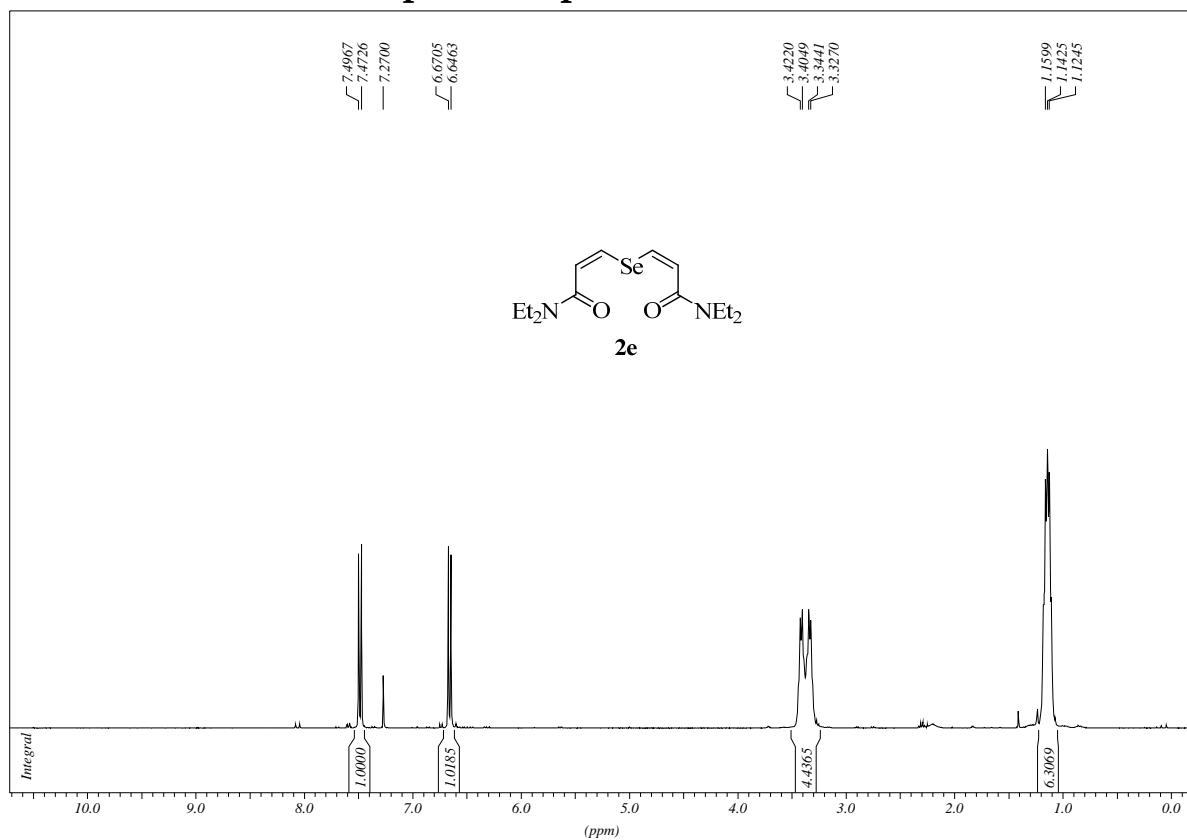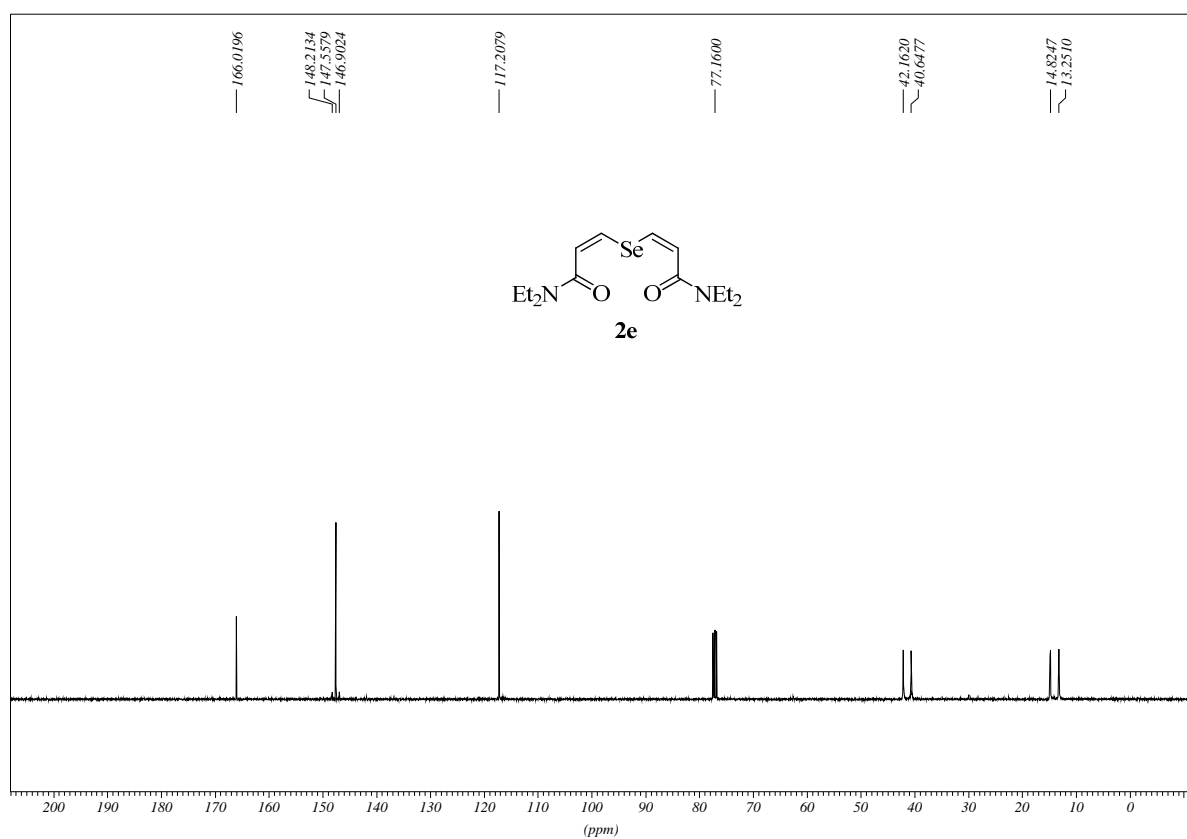

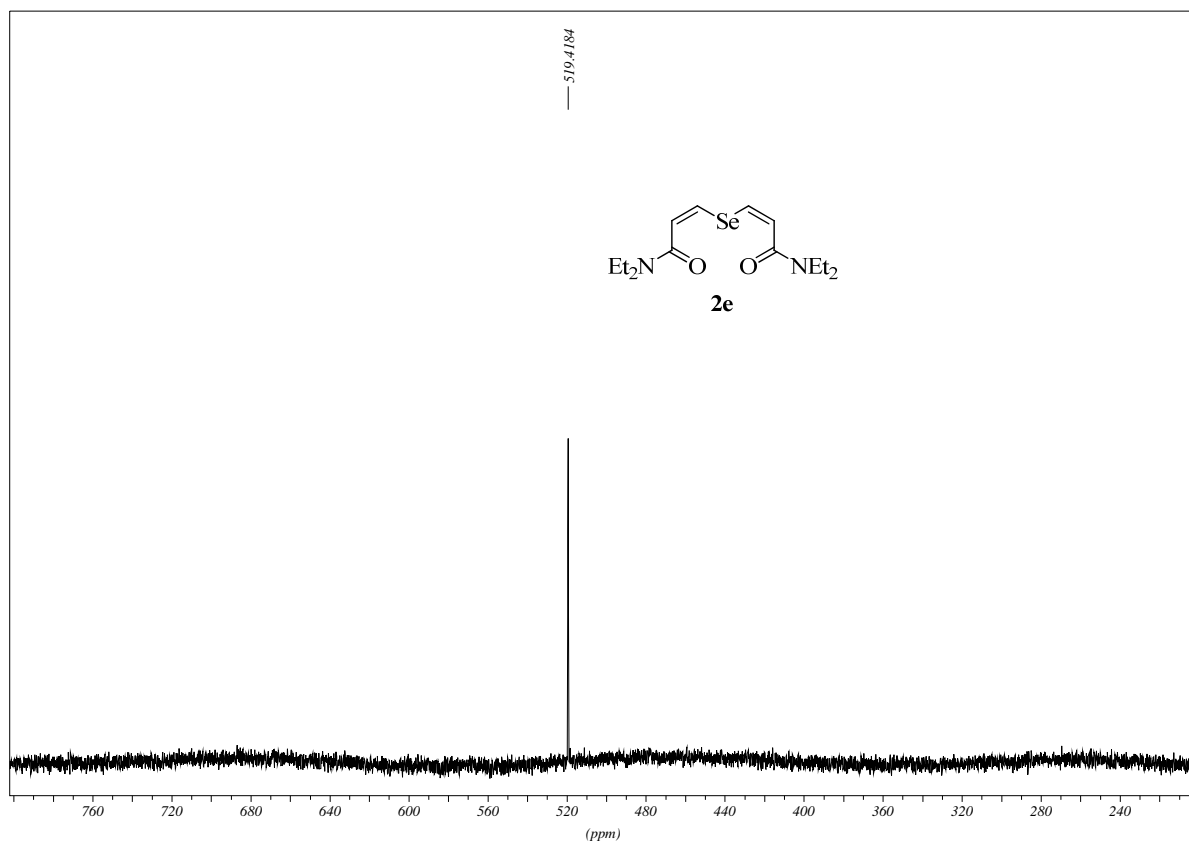

**<sup>1</sup>H, <sup>13</sup>C, and <sup>77</sup>Se NMR spectra of product 2f**

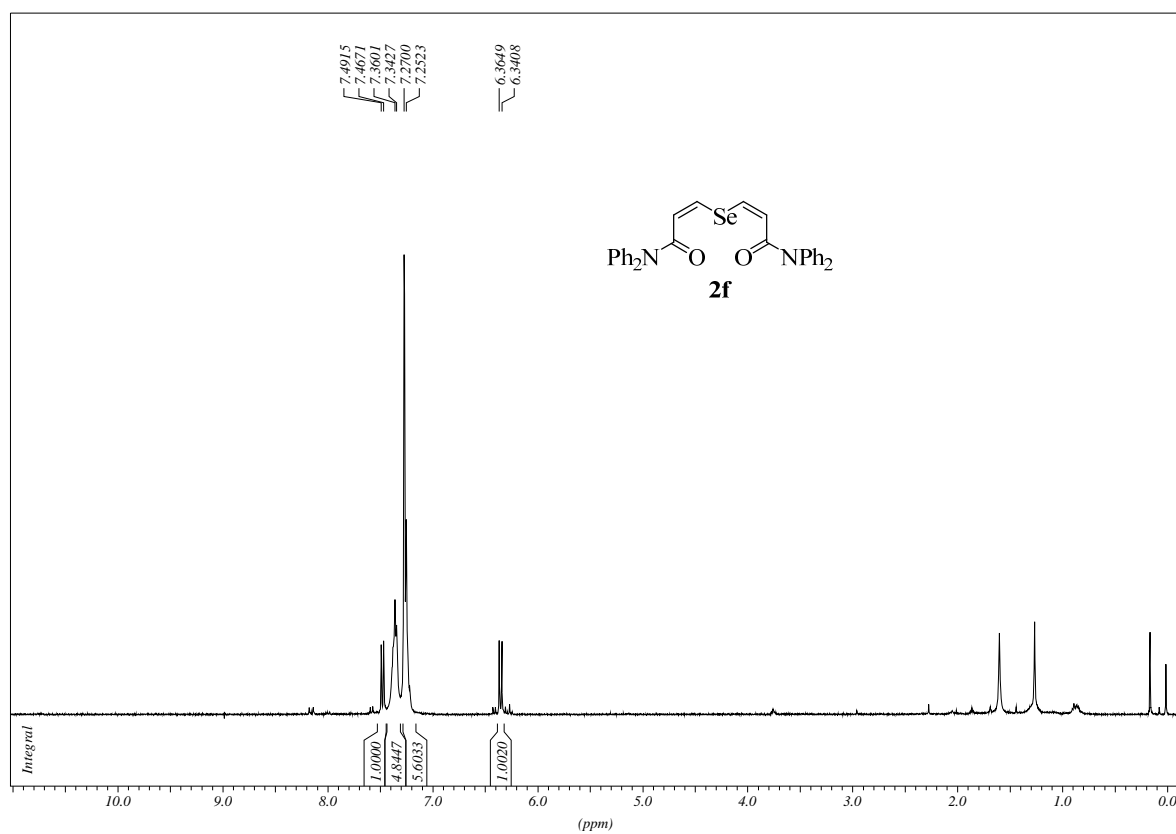



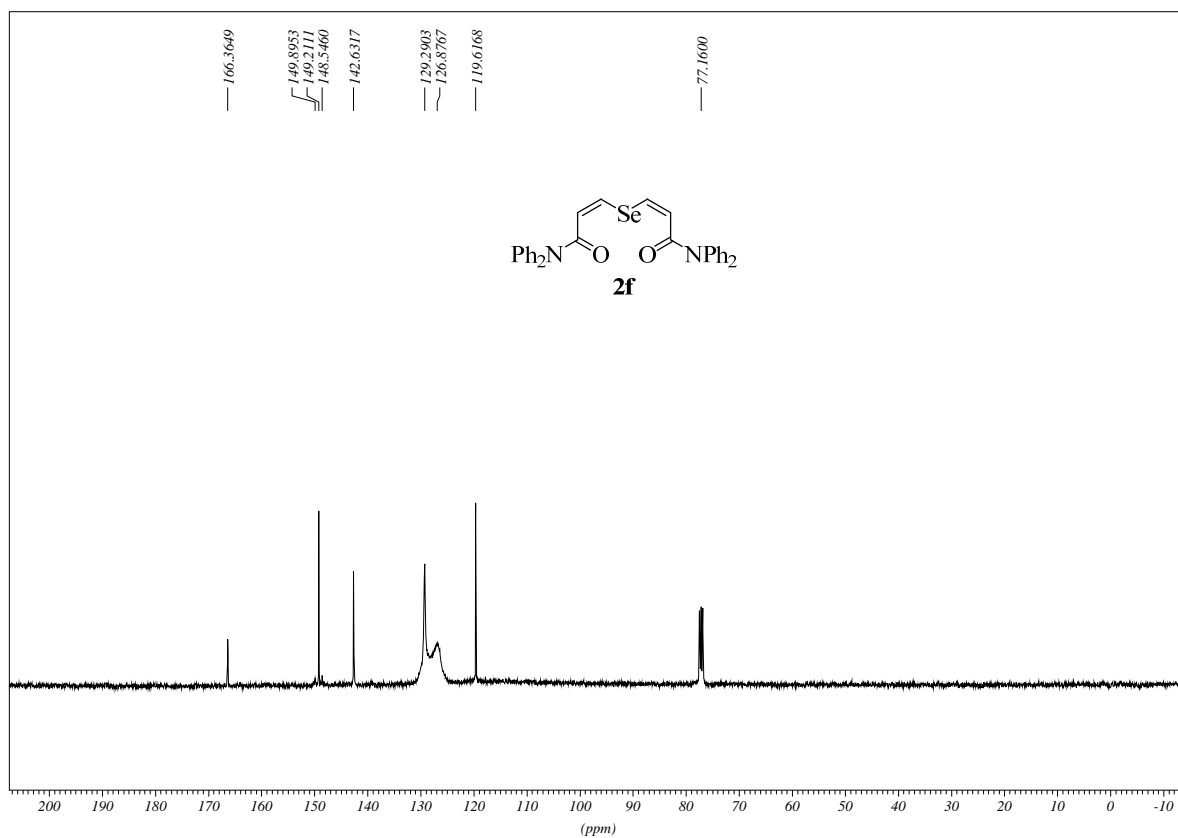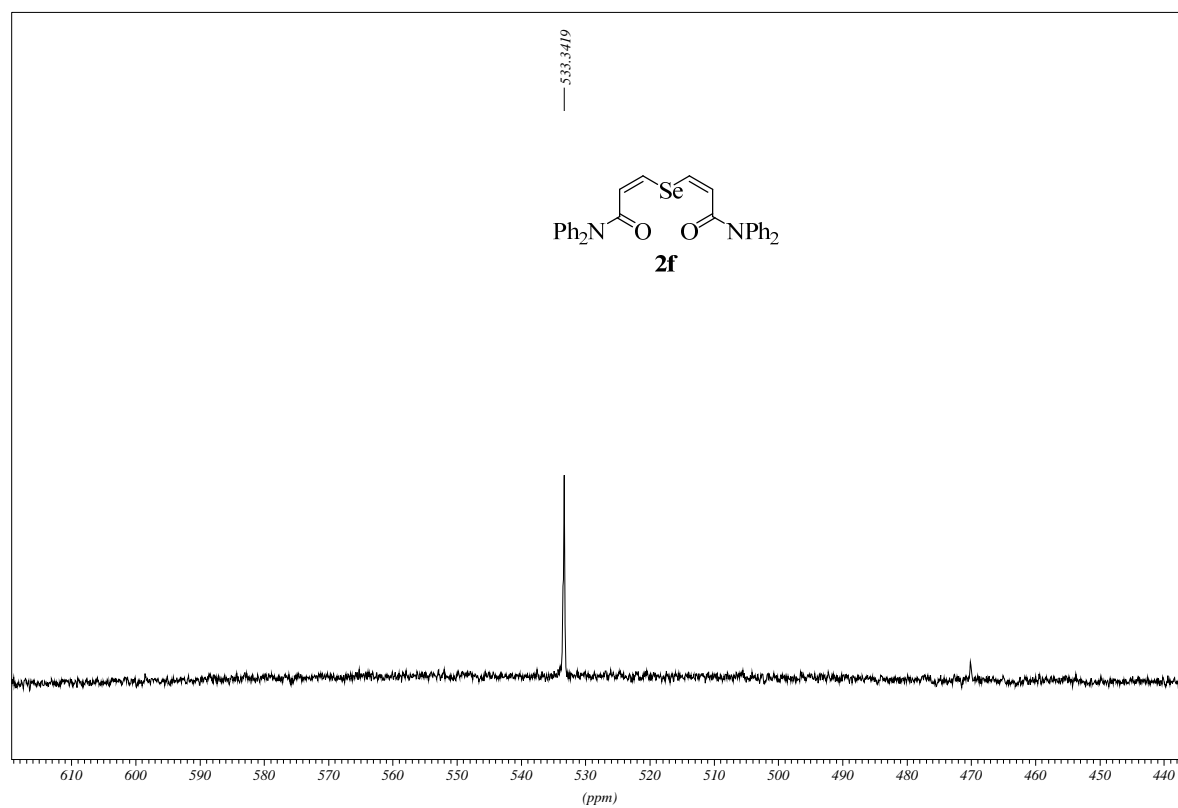

$^1\text{H}$ ,  $^{13}\text{C}$ , and  $^{77}\text{Se}$  NMR spectra of product **2g**

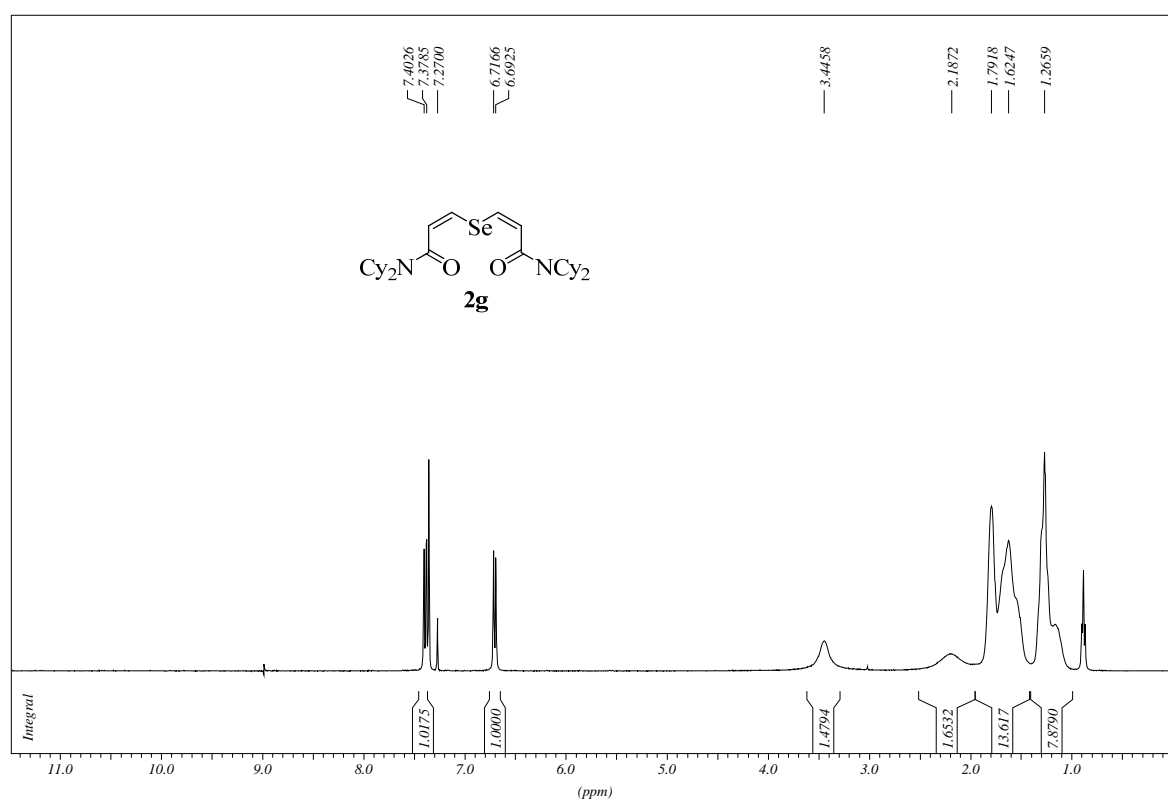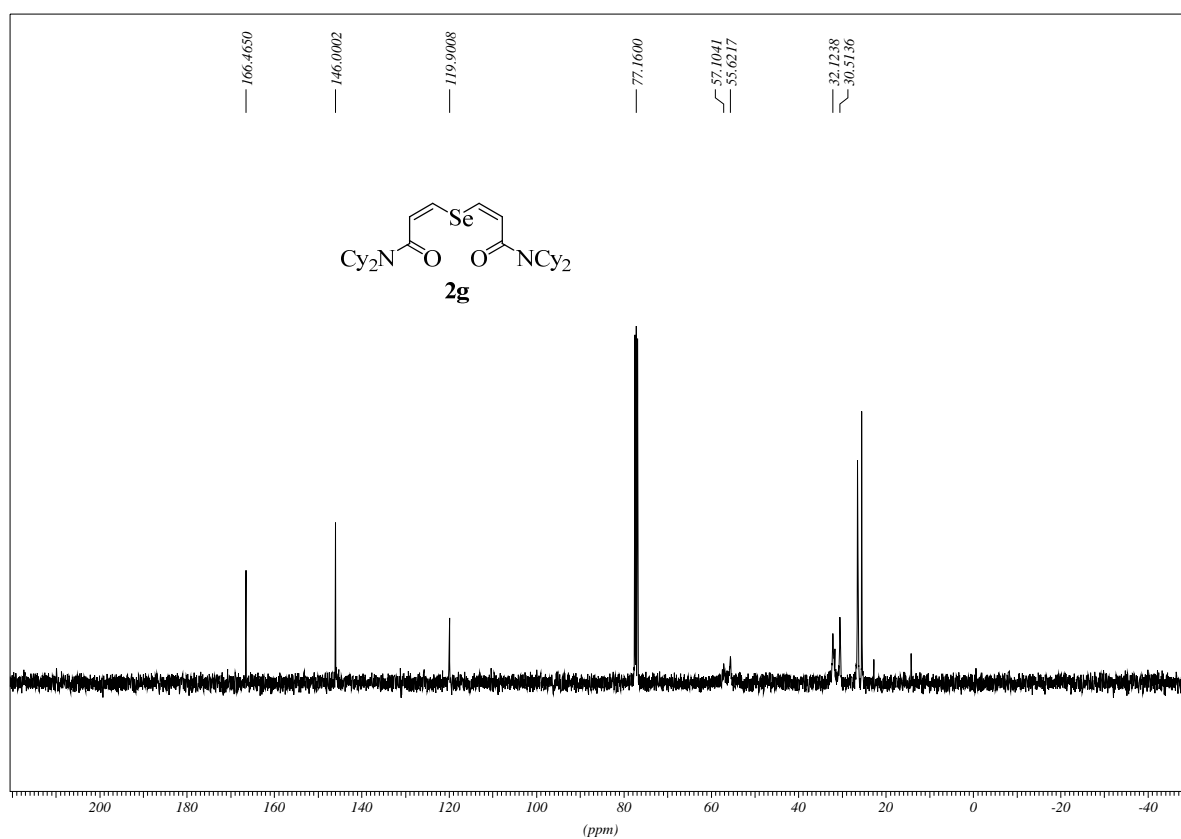

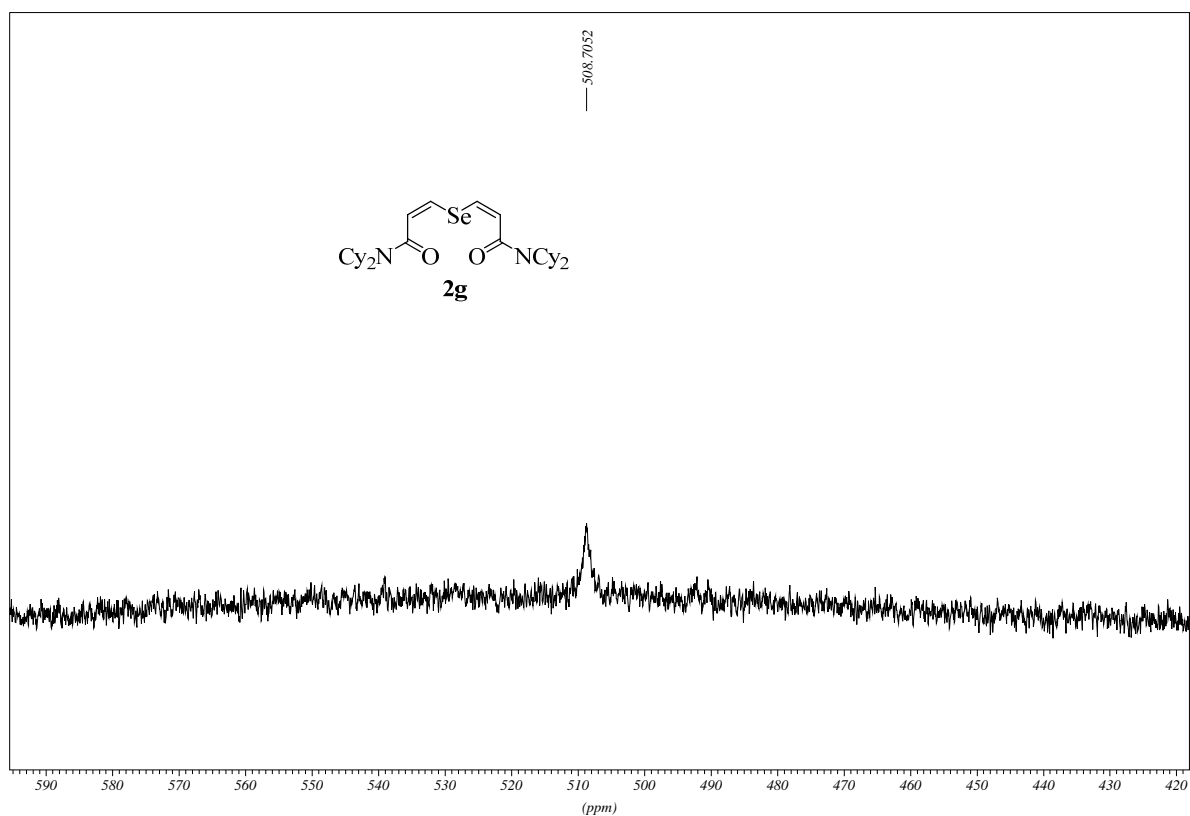

**$^1\text{H}$ ,  $^{13}\text{C}$ , and  $^{77}\text{Se}$  NMR spectra of product 2h**

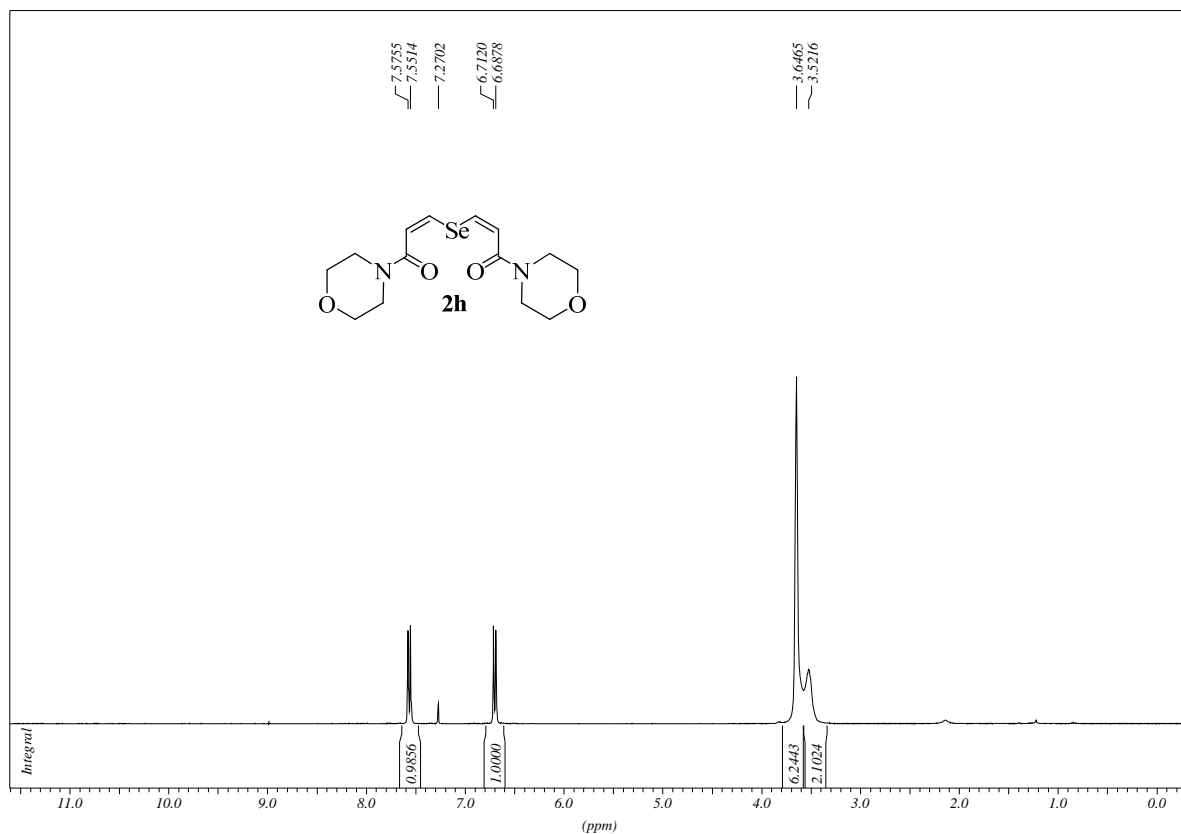

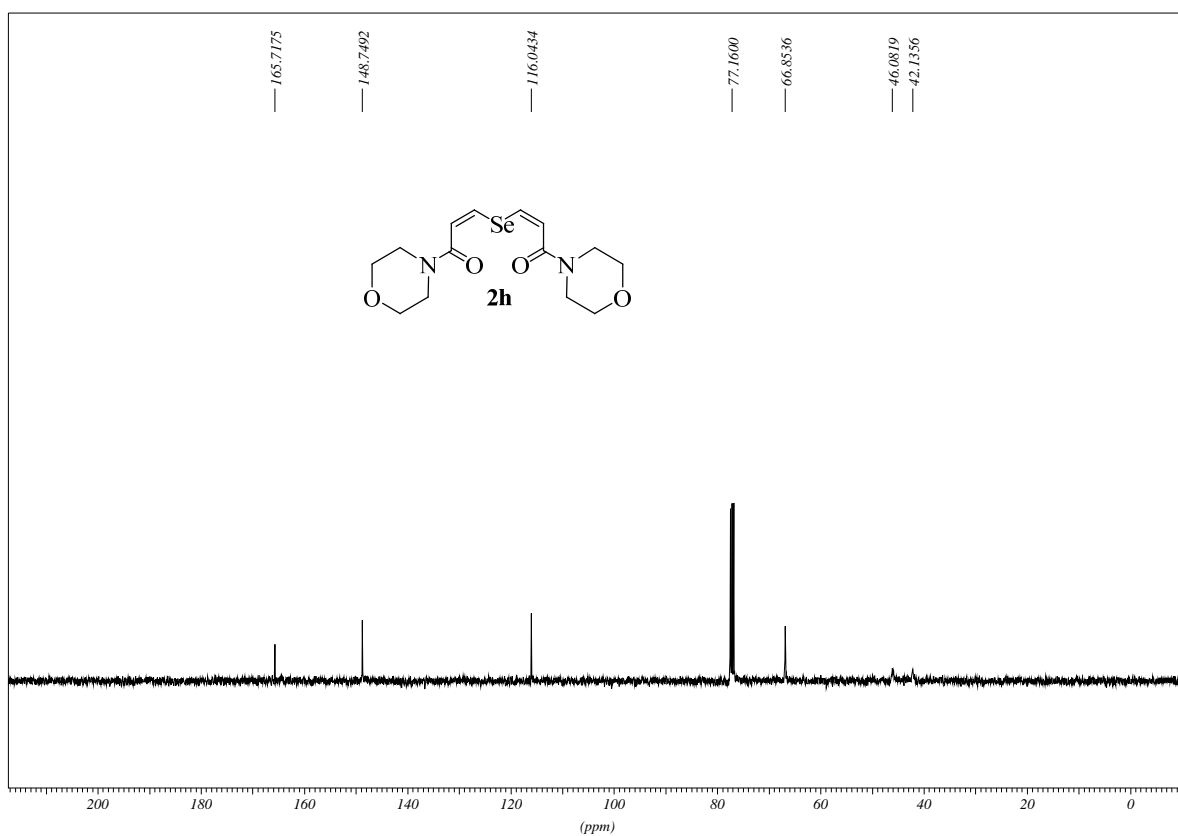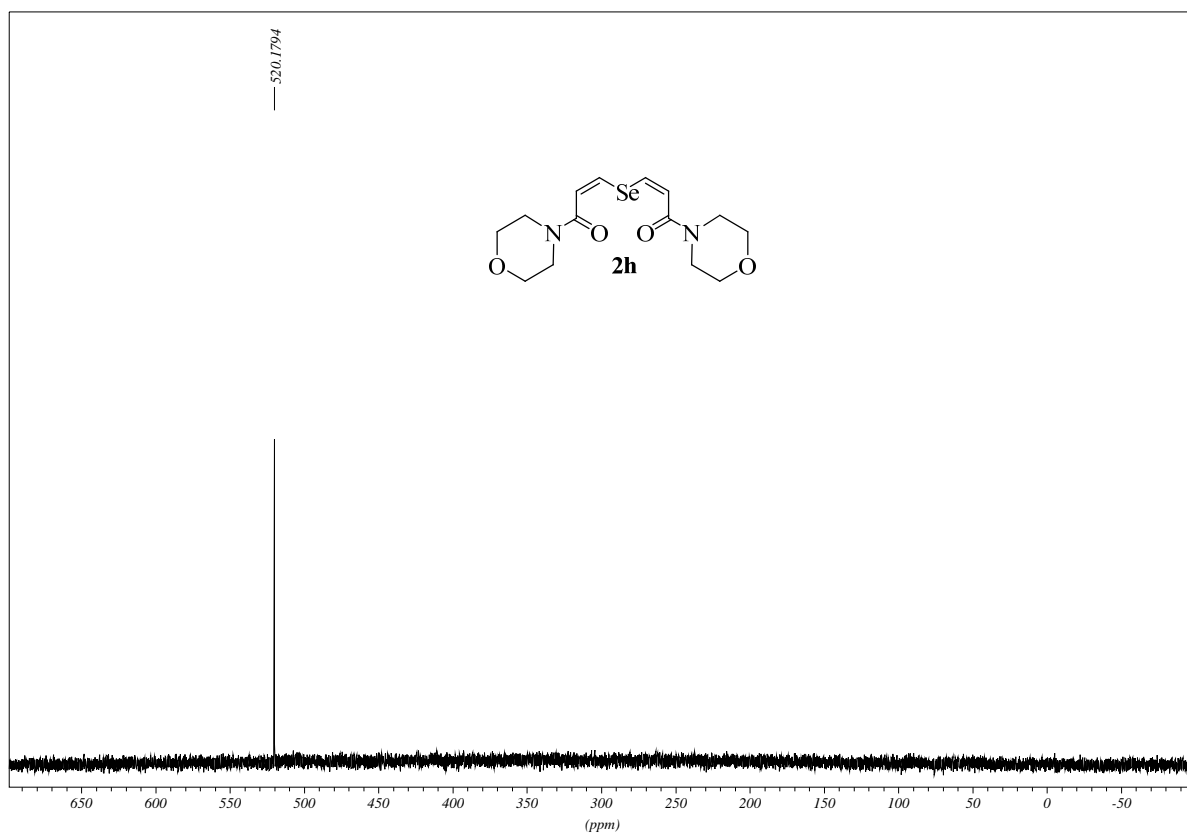

# $^1\text{H}$ , $^{13}\text{C}$ , and $^{77}\text{Se}$ NMR spectra of product **2i**

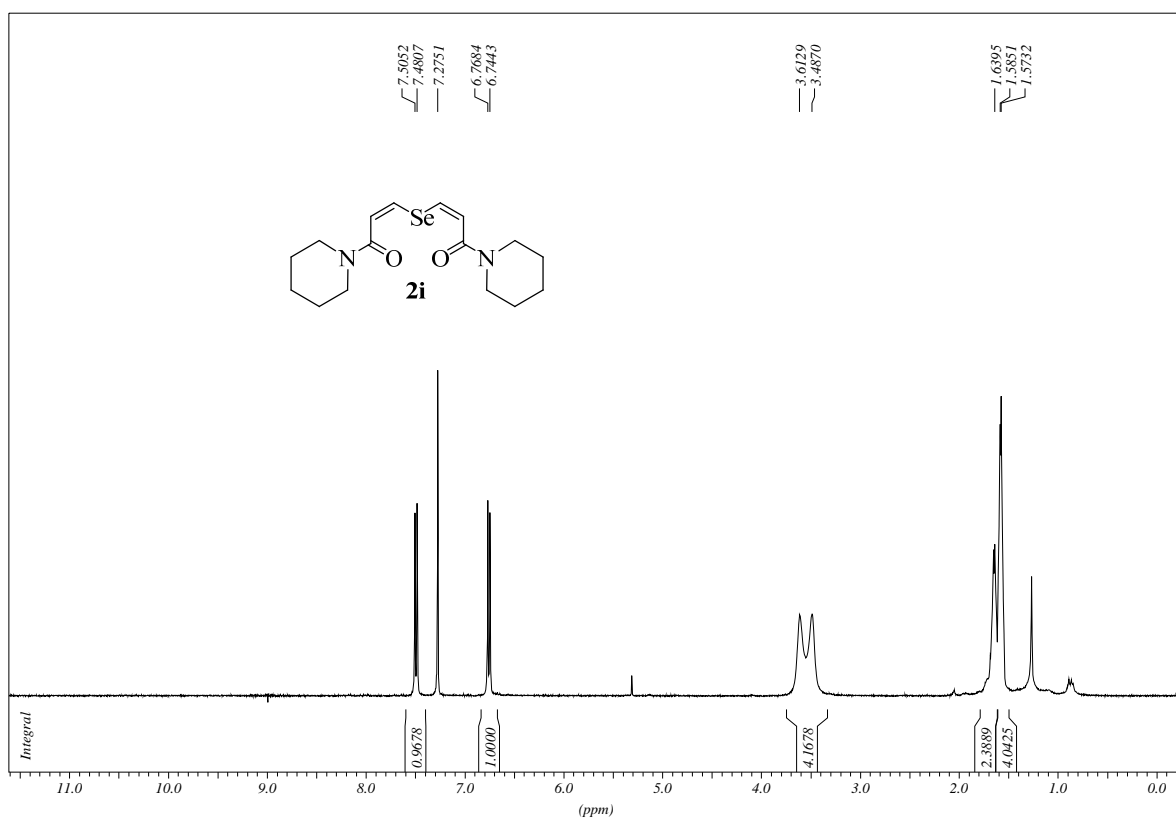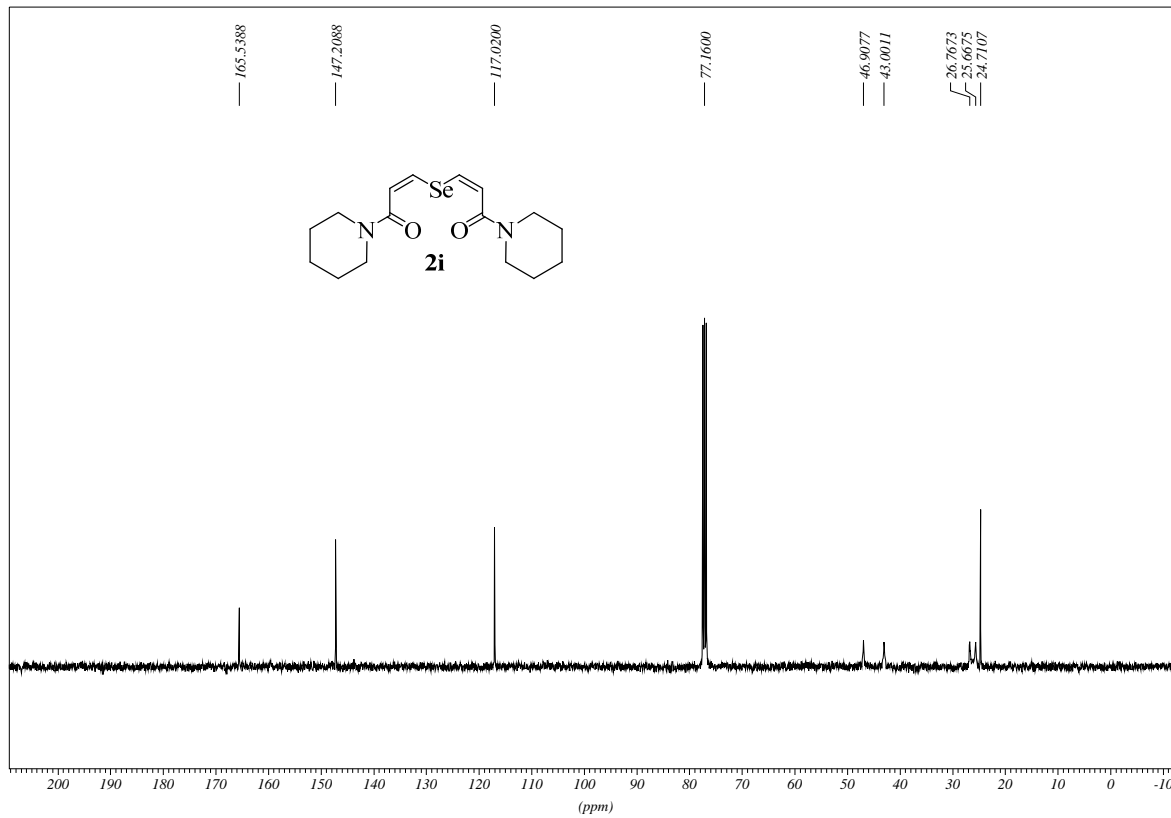

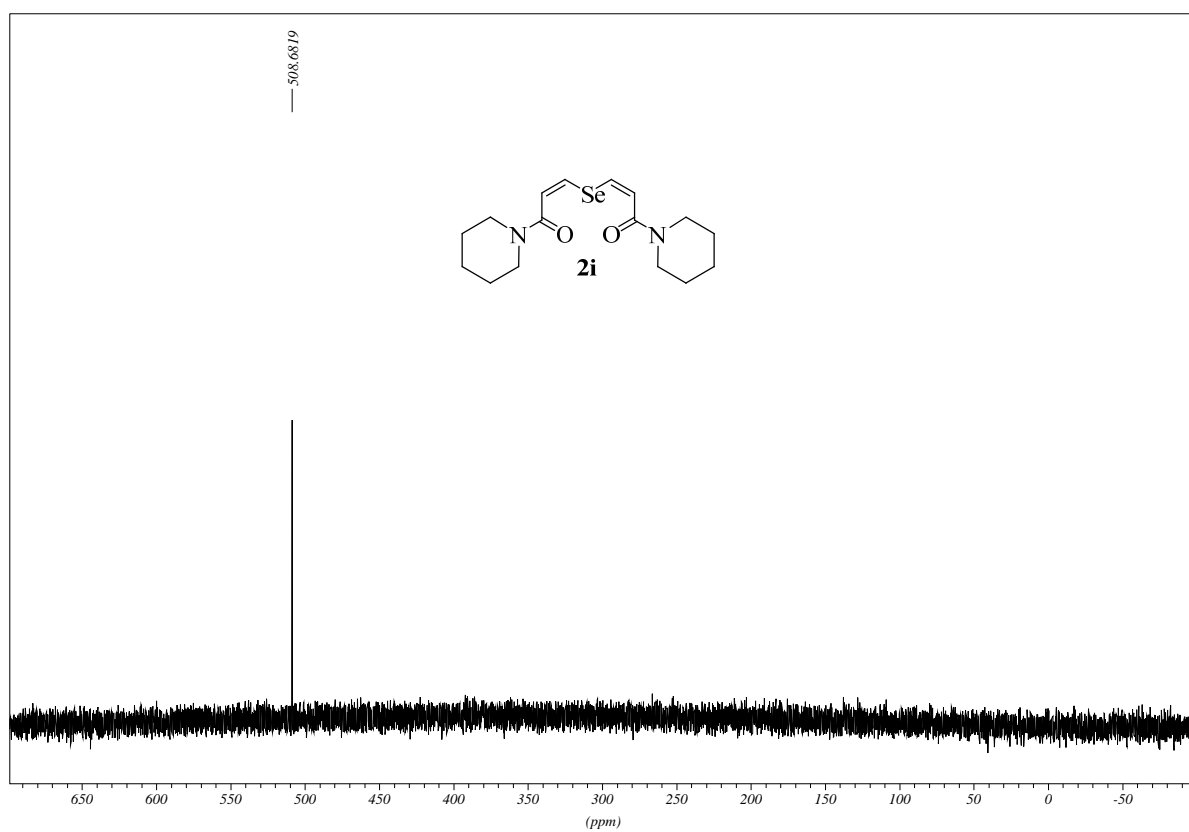

**<sup>1</sup>H, <sup>13</sup>C, and <sup>77</sup>Se NMR spectra of product 3b**

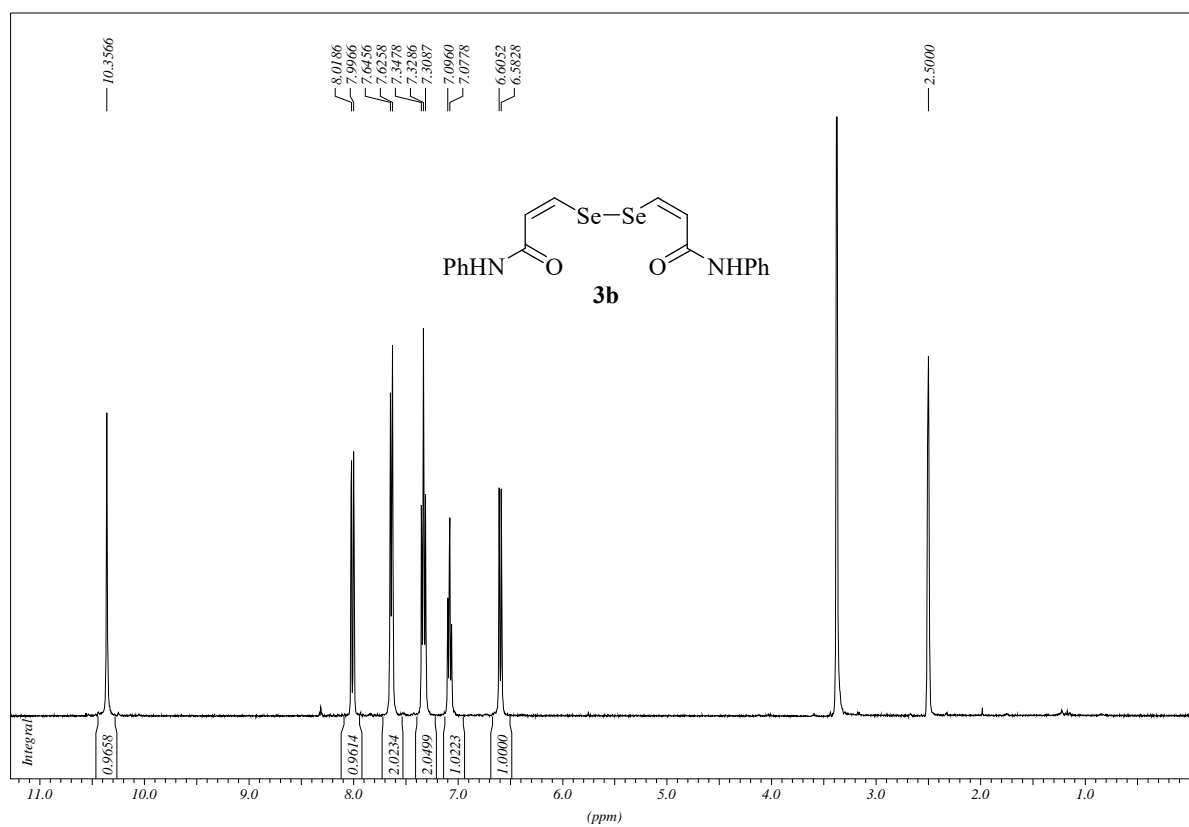

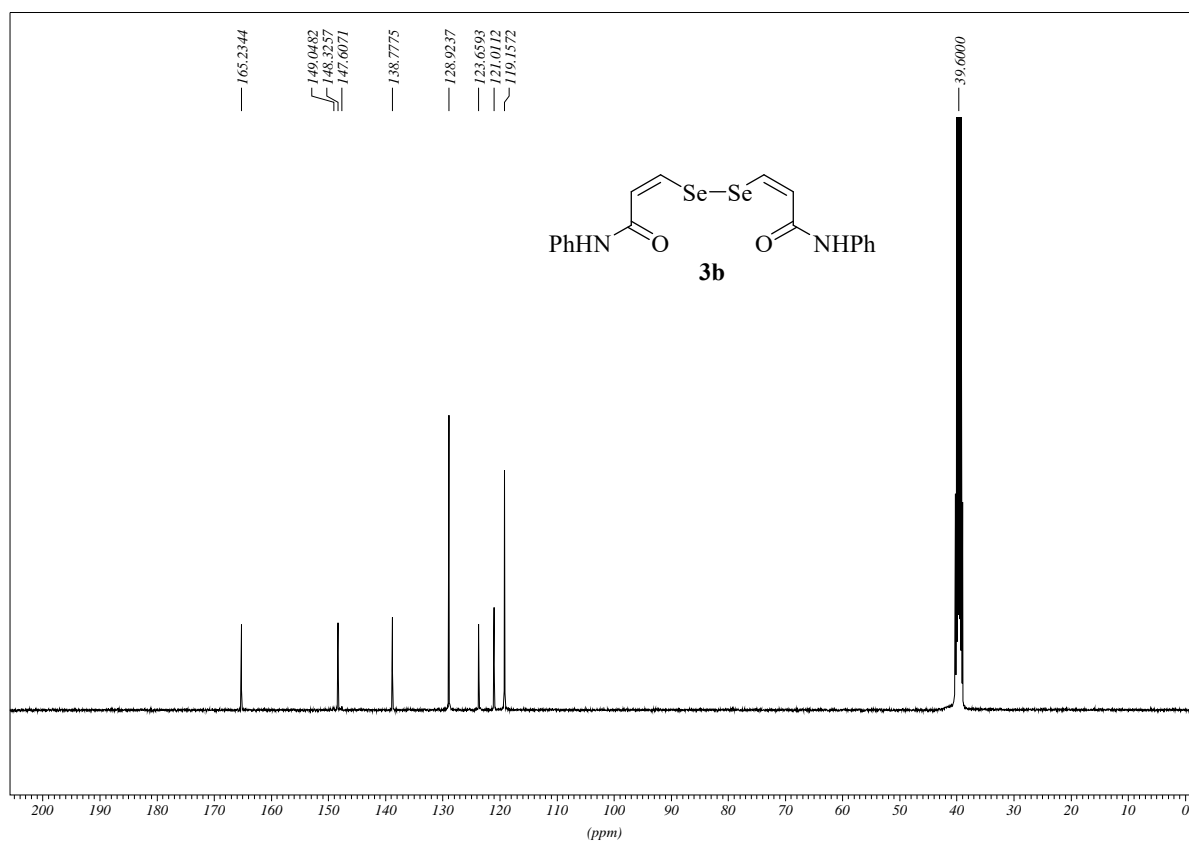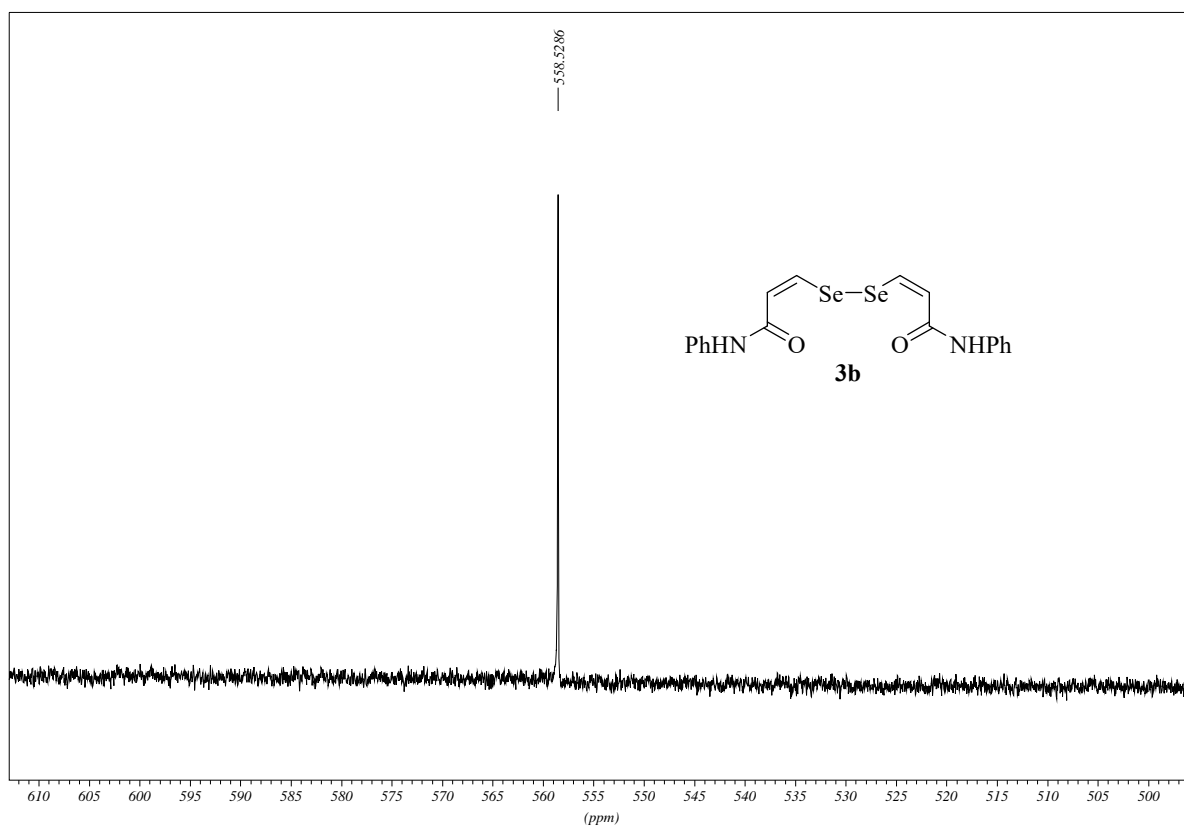

# $^1\text{H}$ , $^{13}\text{C}$ , and $^{77}\text{Se}$ NMR spectra of product 3d

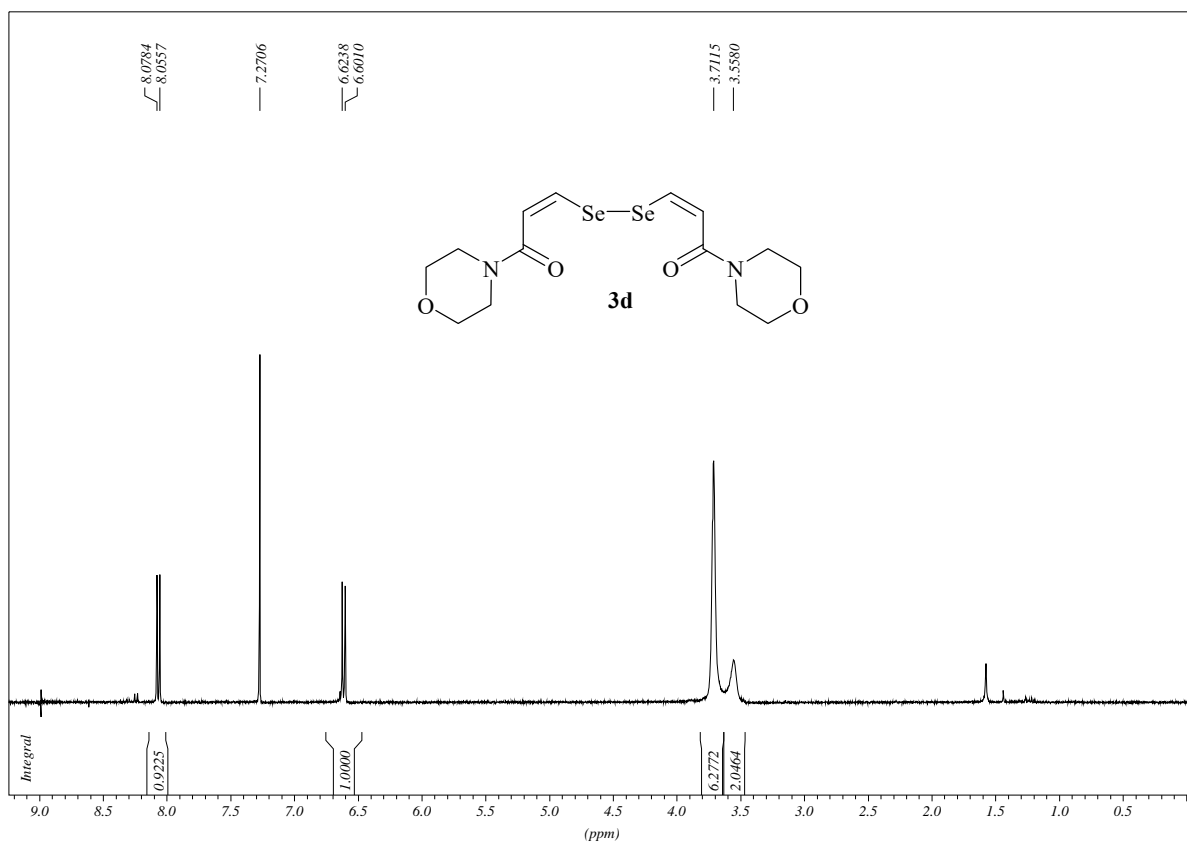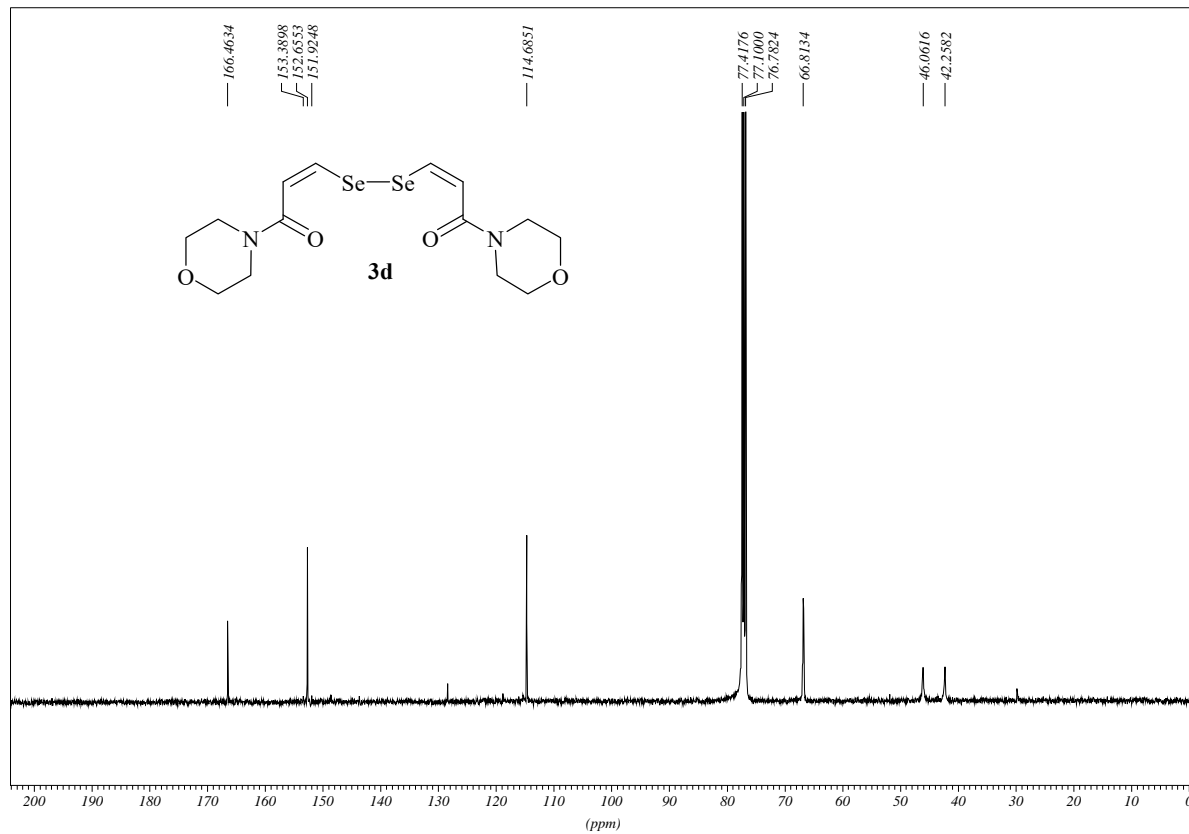



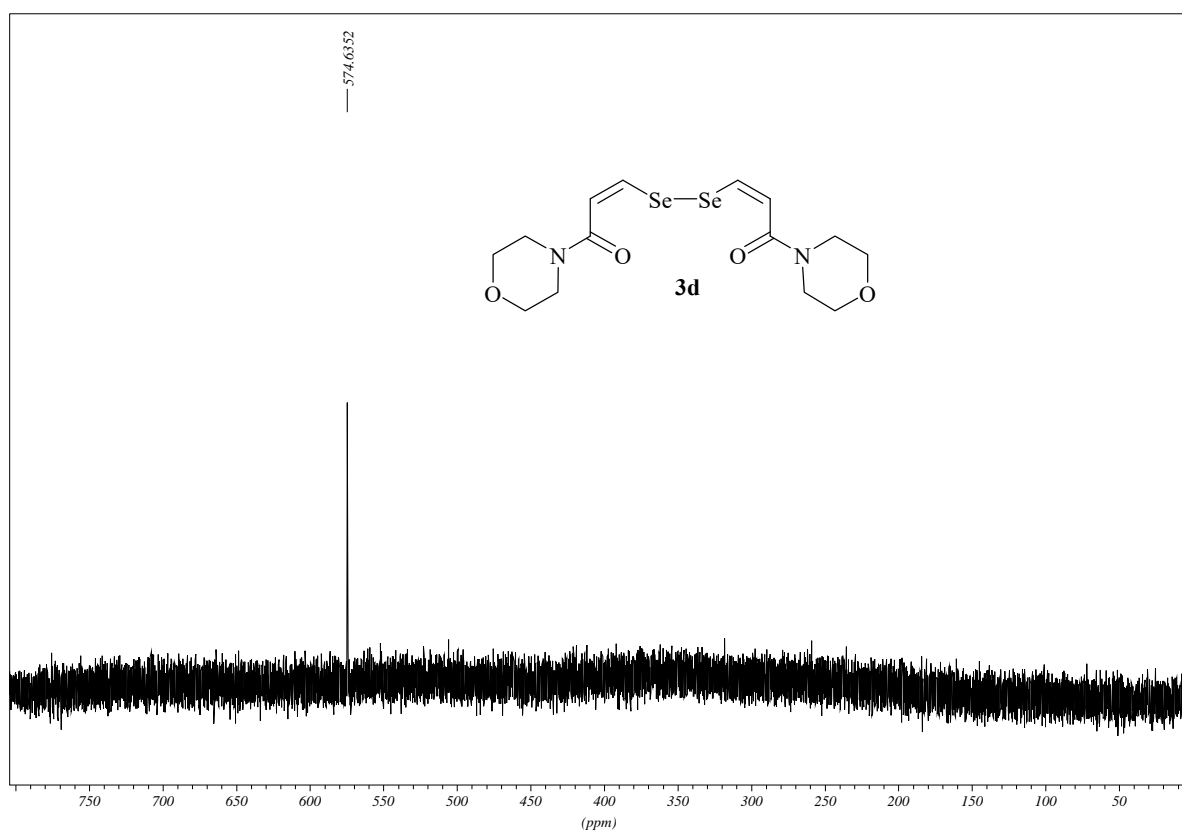

Supplement: s1 [file s1]
